# Supplementary material for: Are we accurately estimating the potential role of pollution in the decline of species at risk in Canada?
Source: Atypon-hosted journal article supplement (doi:10.1139/facets-2019-0025), 2019-06-01

**Are we accurately estimating the potential role of pollution in the decline of species at risk in Canada?**

**Supplementary Material 2:** Maps of Canada showing the presence of mapped sources of each pollution category within each 10km x 10km grid cell that also contains a record for one or more threatened species (yellow). Grid squares with no records of any threatened species are black (note that this does not necessarily indicate there are no pollution sources). No species data was available for Nunavut (white). All maps drawn by the authors using ArcMap 10.2.1.

Figure S2a. Pollution category 9.1, Household Sewage and Urban Waste Water.

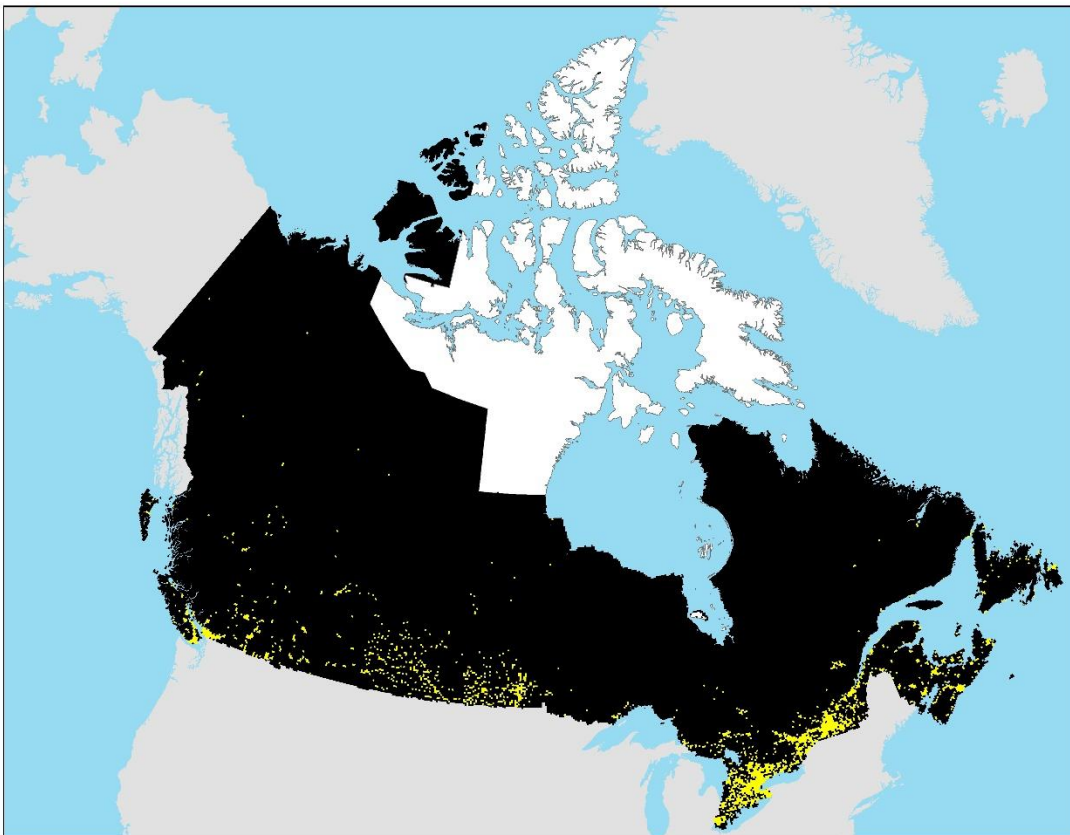

Figure S2b. Pollution category 9.2, Industrial and Military Effluents.

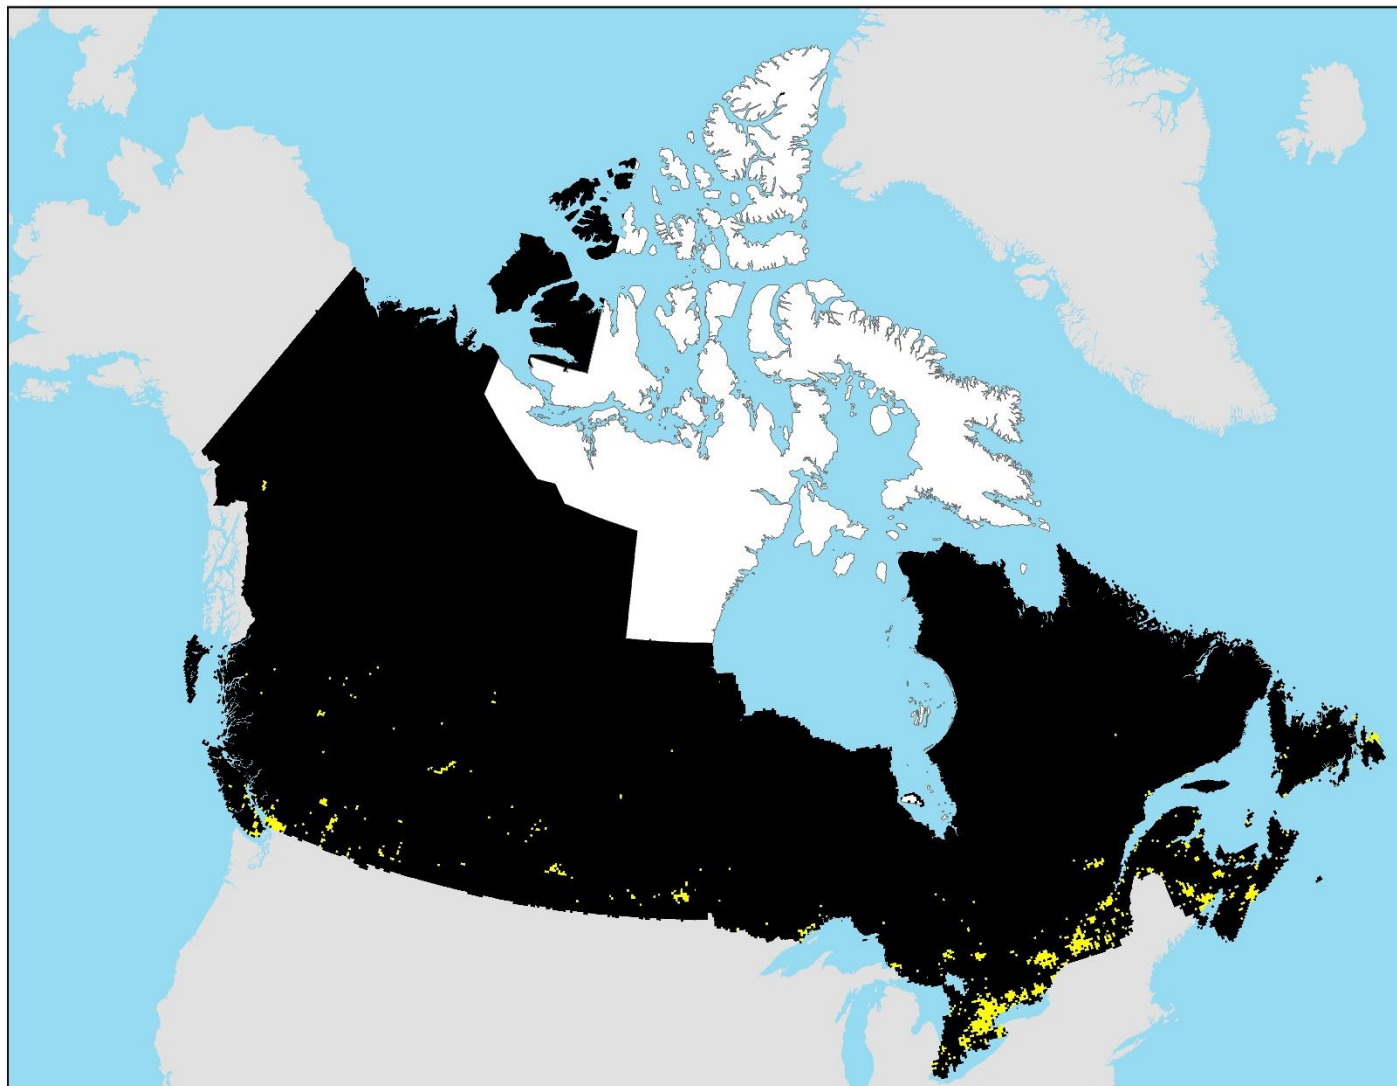

Figure S2c: Pollution category 9.3, Agricultural and Forestry Effluents

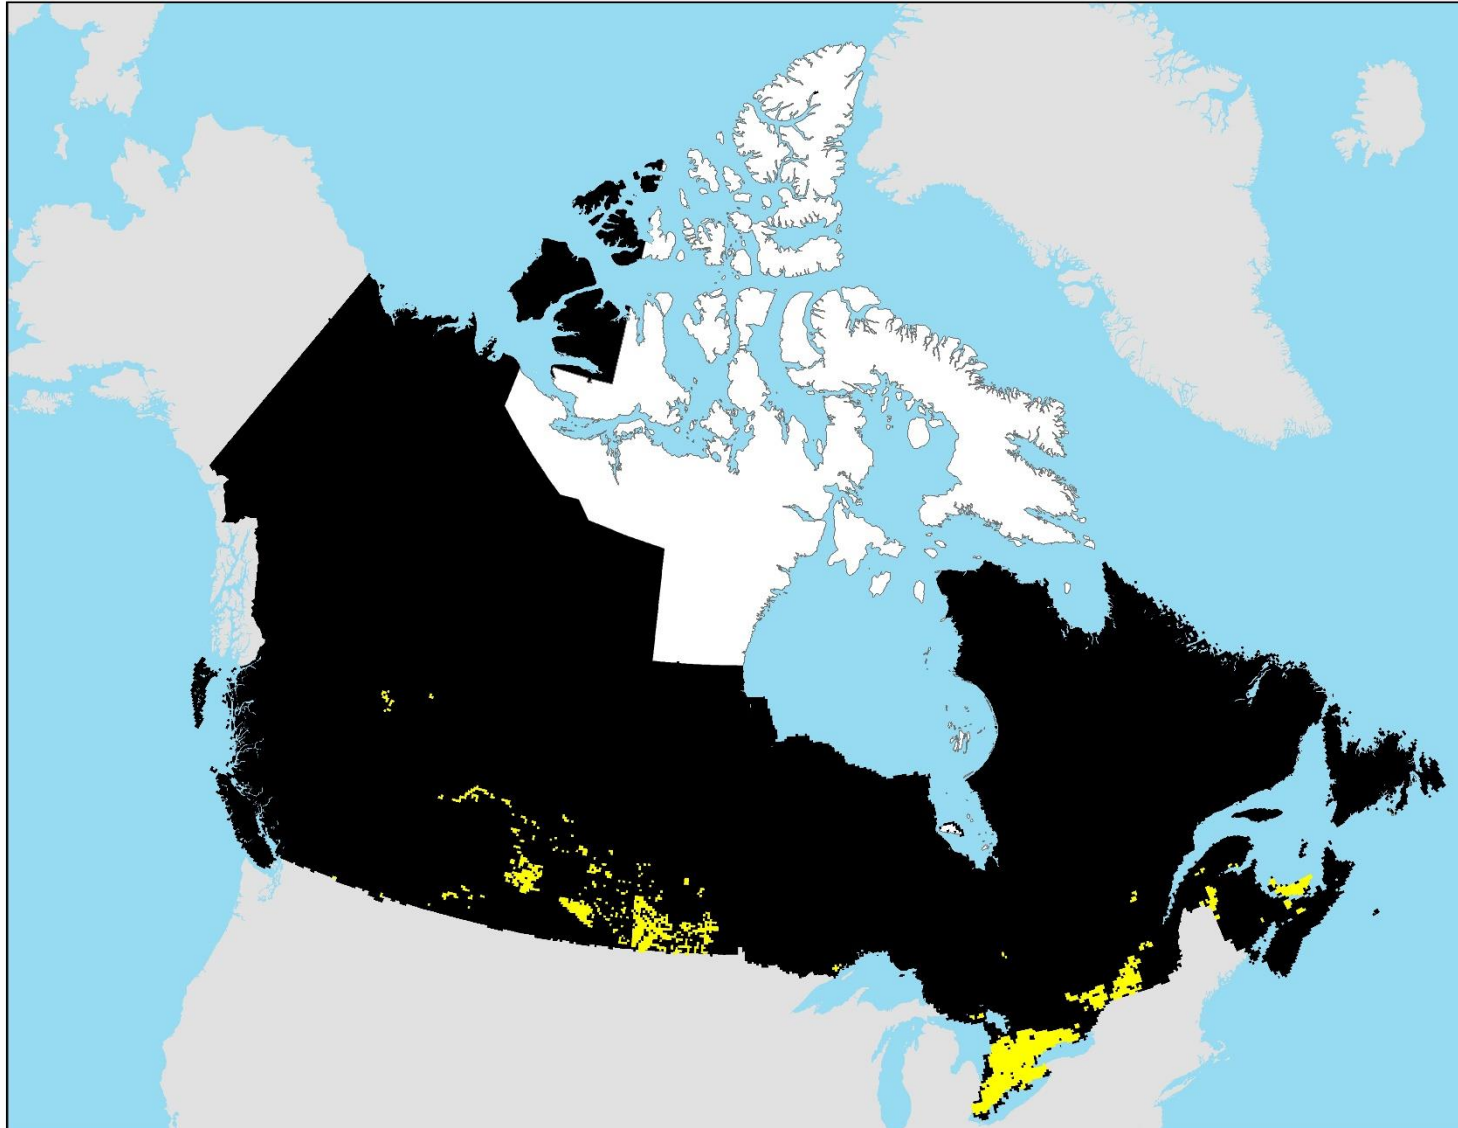

Figure S2d. Pollution type 9.4, Garbage and Solid Waste.

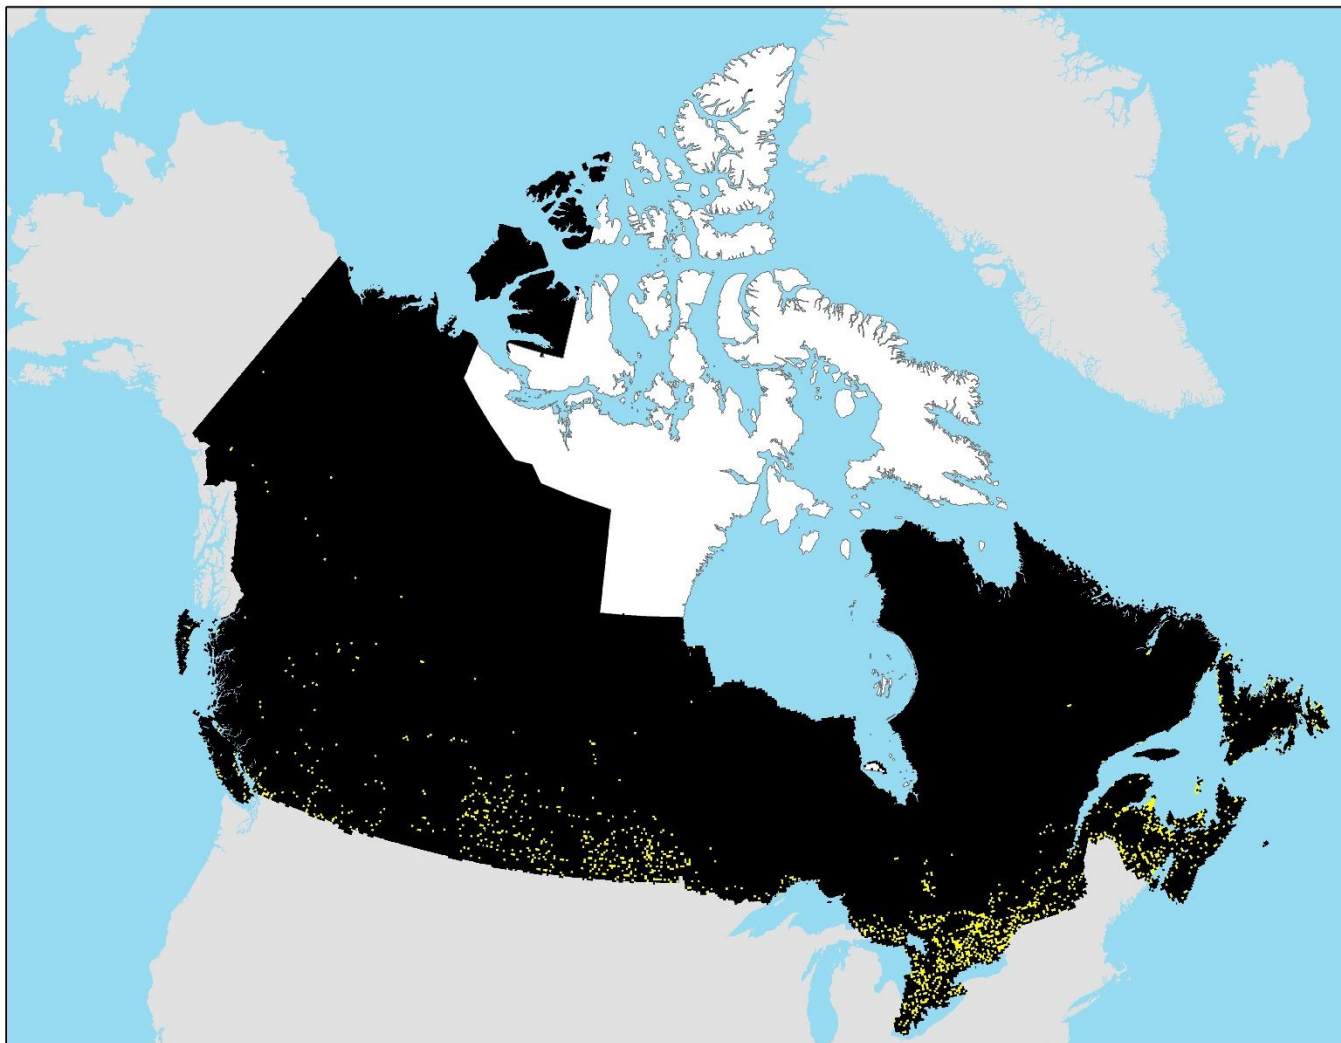

Figure S2e. Pollution type 9.5, Air-borne Pollutants.

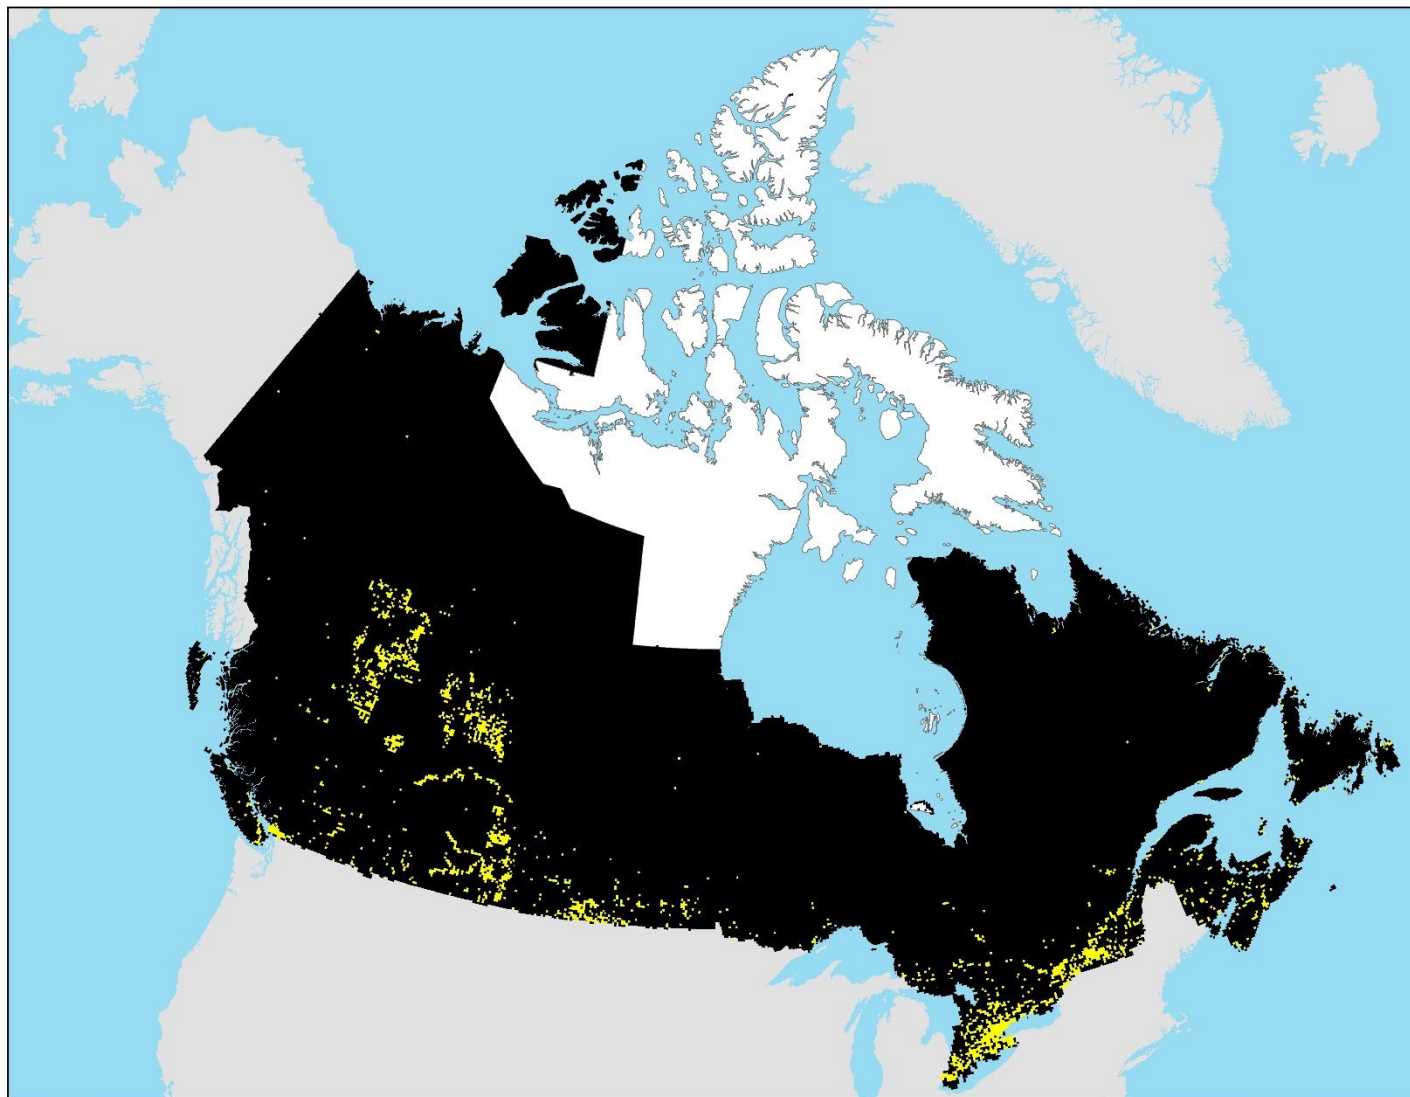

Figure S2f. Excess Energy (bright lights only).

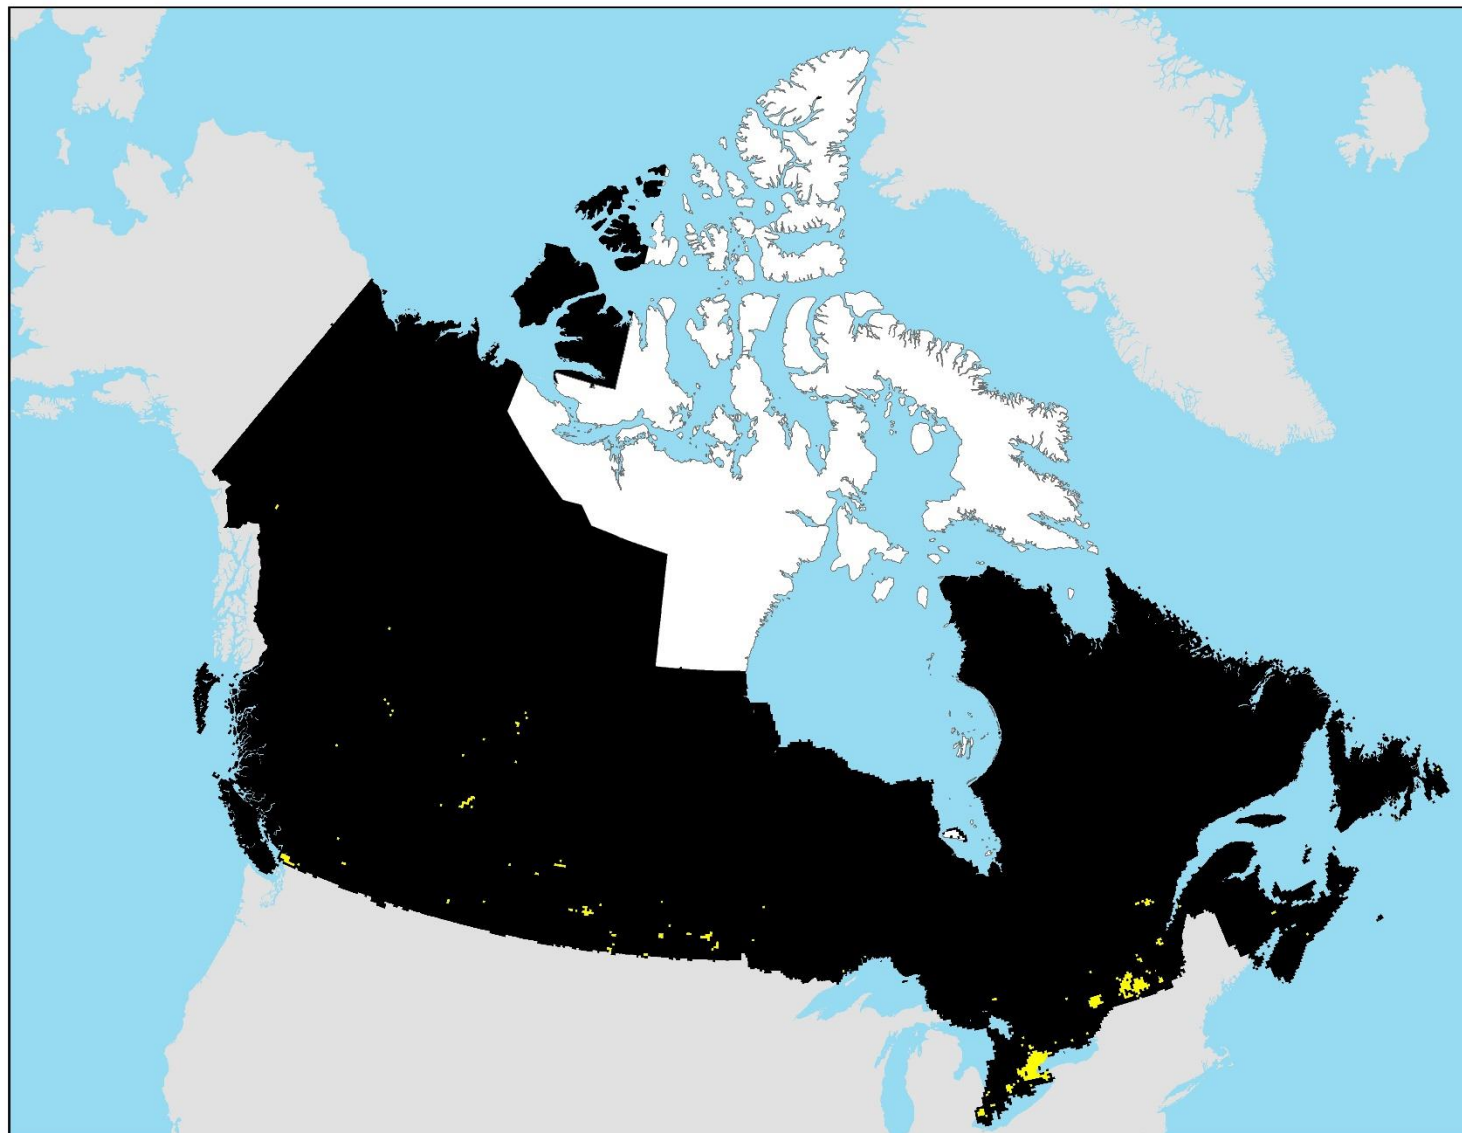

Supplement: facets-2019-0025_supplement2.pdf [file facets-2019-0025_supplement2.pdf]
