# Supplementary material for: Are we accurately estimating the potential role of pollution in the decline of species at risk in Canada?
Source: Atypon-hosted journal article supplement (doi:10.1139/facets-2019-0025), 2019-06-01
Supplement: facets-2019-0025_supplement3.pdf [file facets-2019-0025_supplement3.pdf]

**Are we accurately estimating the potential role of pollution in the decline of species at risk in Canada?**

**Supplementary Material 3:** ANOVA and Tukey’s post-hoc test for differences between taxonomic groups in geographic overlap with sources of pollution (scope<sub>GEO</sub>), all categories and each category separately.

Table S3a. Analysis of Variance Table for effect of taxonomic group on percent geographic overlap with pollution sources (all categories pooled)

|                 | degrees of freedom | sum of squares | mean square | F value | p(>F)     |
|-----------------|--------------------|----------------|-------------|---------|-----------|
| taxonomic group | 9                  | 5.059          | 0.56207     | 4.6872  | 5.625e-06 |
| residuals       | 478                | 57.320         | 0.11992     |         |           |

Table S3b. Results of Tukey’s post-hoc pairwise comparison of means, with Bonferroni correction, for differences between taxonomic groups in the percent geographic overlap with pollution sources (all categories pooled). Pairs with significant differences ( $\Pr(>|t|) < 0.05$ ) are bold.

| comparison                       | Estimate  | Std. Error | t value | Pr(> t ) |
|----------------------------------|-----------|------------|---------|----------|
| arthropods vs. amphibians        | 0.091934  | 0.096665   | 0.951   | 1        |
| birds vs. amphibians             | -0.0288   | 0.085882   | -0.335  | 1        |
| freshwater fishes vs. amphibians | 0.168848  | 0.089056   | 1.896   | 1        |
| lichens vs. amphibians           | -0.23301  | 0.117067   | -1.99   | 1        |
| mammals vs. amphibians           | -0.17682  | 0.096665   | -1.829  | 1        |
| molluscs vs. amphibians          | 0.224831  | 0.103473   | 2.173   | 1        |
| mosses vs. amphibians            | 0.112096  | 0.122207   | 0.917   | 1        |
| reptiles vs. amphibians          | 0.068235  | 0.094611   | 0.721   | 1        |
| vascular plants vs. amphibians   | 0.066478  | 0.079718   | 0.834   | 1        |
| birds vs. arthropods             | -0.12074  | 0.072796   | -1.659  | 1        |
| freshwater fishes vs. arthropods | 0.076914  | 0.076514   | 1.005   | 1        |
| lichens vs. arthropods           | -0.32495  | 0.107834   | -3.013  | 0.122423 |
| mammals vs. arthropods           | -0.26875  | 0.08525    | -3.153  | 0.077421 |
| molluscs vs. arthropods          | 0.132897  | 0.092899   | 1.431   | 1        |
| mosses vs. arthropods            | 0.020161  | 0.113393   | 0.178   | 1        |
| reptiles vs. arthropods          | -0.0237   | 0.082914   | -0.286  | 1        |
| vascular plants vs. arthropods   | -0.025456 | 0.06541    | -0.389  | 1        |
| freshwater fishes vs. birds      | 0.197653  | 0.062339   | 3.171   | 0.072849 |
| lichens vs. birds                | -0.20421  | 0.098285   | -2.078  | 1        |

| comparison                                  | Estimate        | Std. Error      | t value       | Pr(> t )        |
|---------------------------------------------|-----------------|-----------------|---------------|-----------------|
| mammals vs. birds                           | -0.14801        | 0.072796        | -2.033        | 1               |
| molluscs vs. birds                          | 0.253635        | 0.081621        | 3.107         | 0.089967        |
| mosses vs. birds                            | 0.1409          | 0.104354        | 1.35          | 1               |
| reptiles vs. birds                          | 0.09704         | 0.070046        | 1.385         | 1               |
| vascular plants vs. birds                   | 0.095282        | 0.048065        | 1.982         | 1               |
| <b><i>lichens vs. freshwater fishes</i></b> | <b>-0.40186</b> | <b>0.101069</b> | <b>-3.976</b> | <b>0.00364</b>  |
| <b><i>mammals vs. freshwater fishes</i></b> | <b>-0.34567</b> | <b>0.076514</b> | <b>-4.518</b> | <b>0.000355</b> |
| molluscs vs. freshwater fishes              | 0.055982        | 0.084954        | 0.659         | 1               |
| mosses vs. freshwater fishes                | -0.05675        | 0.106981        | -0.53         | 1               |
| reptiles vs. freshwater fishes              | -0.10061        | 0.073903        | -1.361        | 1               |
| vascular plants vs. freshwater fishes       | -0.10237        | 0.053529        | -1.912        | 1               |
| mammals vs. lichens                         | 0.056195        | 0.107834        | 0.521         | 1               |
| <b><i>molluscs vs. lichens</i></b>          | <b>0.457844</b> | <b>0.113977</b> | <b>4.017</b>  | <b>0.00308</b>  |
| mosses vs. lichens                          | 0.345108        | 0.13122         | 2.63          | 0.396619        |
| reptiles vs. lichens                        | 0.301248        | 0.105997        | 2.842         | 0.210336        |
| vascular plants vs. lichens                 | 0.299491        | 0.092947        | 3.222         | 0.061156        |
| <b><i>molluscs vs. mammals</i></b>          | <b>0.401649</b> | <b>0.092899</b> | <b>4.323</b>  | <b>0.000842</b> |
| mosses vs. mammals                          | 0.288914        | 0.113393        | 2.548         | 0.501731        |
| reptiles vs. mammals                        | 0.245053        | 0.082914        | 2.956         | 0.147409        |
| <b><i>vascular plants vs. mammals</i></b>   | <b>0.243296</b> | <b>0.06541</b>  | <b>3.72</b>   | <b>0.010047</b> |
| mosses vs. molluscs                         | -0.11274        | 0.119251        | -0.945        | 1               |
| reptiles vs. molluscs                       | -0.1566         | 0.09076         | -1.725        | 1               |
| vascular plants vs. molluscs                | -0.15835        | 0.075108        | -2.108        | 1               |
| reptiles vs. mosses                         | -0.04386        | 0.111648        | -0.393        | 1               |
| vascular plants vs. mosses                  | -0.04562        | 0.099343        | -0.459        | 1               |
| vascular plants vs. reptiles                | -0.00176        | 0.062335        | -0.028        | 1               |

Figure S3a: Proportion of occupied cells that contain one or more sources of pollution category 9.1 – Household Sewage and Urban Waste Water, by taxonomic group

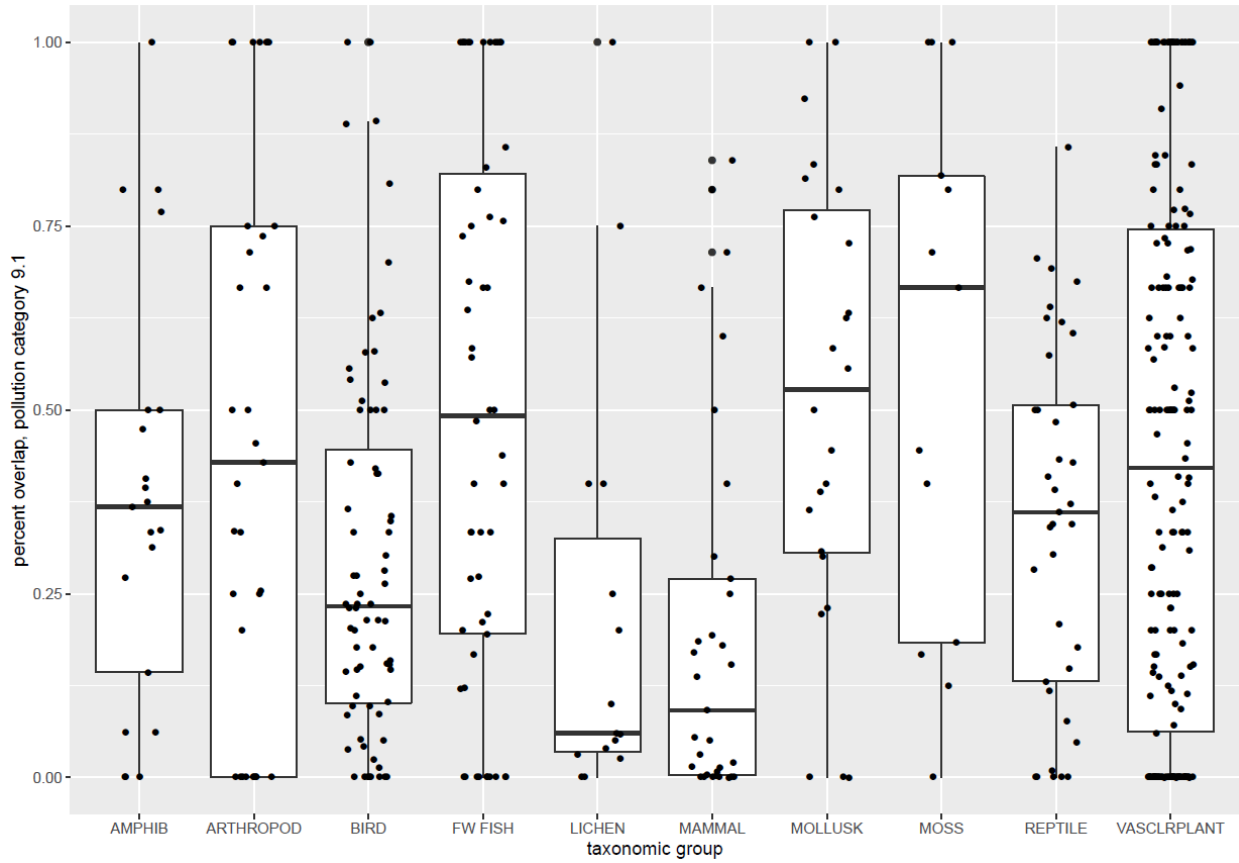

Table S3c. Analysis of Variance Table for effect of taxonomic group on percent geographic overlap with pollution sources, category 9.1 only

|                 | degrees of freedom | sum of squares | mean square | F value | p(>F)    |
|-----------------|--------------------|----------------|-------------|---------|----------|
| taxonomic group | 9                  | 4.311          | 0.47901     | 4.416   | 1.44e-05 |
| residuals       | 478                | 51.849         | 0.10847     |         |          |

Table S3d. Results of Tukey's post-hoc pairwise comparison of means, with Bonferroni correction, for differences between taxonomic groups in the percent geographic overlap with pollution sources – category 9.1 only. Pairs with significant differences ( $Pr(>|t|) < 0.05$ ) are bold.

| comparison                            | Estimate        | Std. Error     | t value       | Pr(> t )       |
|---------------------------------------|-----------------|----------------|---------------|----------------|
| arthropods vs. amphibians             | 0.08391         | 0.09194        | 0.913         | 1              |
| birds vs. amphibians                  | -0.08021        | 0.08168        | -0.982        | 1              |
| freshwater fishes vs. amphibians      | 0.12594         | 0.0847         | 1.487         | 1              |
| lichens vs. amphibians                | -0.15209        | 0.11134        | -1.366        | 1              |
| mammals vs. amphibians                | -0.17501        | 0.09194        | -1.904        | 1              |
| molluscs vs. amphibians               | 0.14085         | 0.09841        | 1.431         | 1              |
| mosses vs. amphibians                 | 0.18659         | 0.11623        | 1.605         | 1              |
| reptiles vs. amphibians               | -0.02764        | 0.08998        | -0.307        | 1              |
| vascular plants vs. amphibians        | 0.06392         | 0.07582        | 0.843         | 1              |
| birds vs. arthropods                  | -0.16412        | 0.06924        | -2.37         | 0.81721        |
| freshwater fishes vs. arthropods      | 0.04203         | 0.07277        | 0.578         | 1              |
| lichens vs. arthropods                | -0.23599        | 0.10256        | -2.301        | 0.98184        |
| mammals vs. arthropods                | -0.25892        | 0.08108        | -3.193        | 0.06745        |
| molluscs vs. arthropods               | 0.05694         | 0.08836        | 0.644         | 1              |
| mosses vs. arthropods                 | 0.10268         | 0.10785        | 0.952         | 1              |
| reptiles vs. arthropods               | -0.11155        | 0.07886        | -1.415        | 1              |
| vascular plants vs. arthropods        | -0.01999        | 0.06221        | -0.321        | 1              |
| <b>freshwater fishes vs. birds</b>    | <b>0.20615</b>  | <b>0.05929</b> | <b>3.477</b>  | <b>0.0249</b>  |
| lichens vs. birds                     | -0.07187        | 0.09348        | -0.769        | 1              |
| mammals vs. birds                     | -0.0948         | 0.06924        | -1.369        | 1              |
| molluscs vs. birds                    | 0.22106         | 0.07763        | 2.848         | 0.2067         |
| mosses vs. birds                      | 0.2668          | 0.09925        | 2.688         | 0.33458        |
| reptiles vs. birds                    | 0.05257         | 0.06662        | 0.789         | 1              |
| vascular plants vs. birds             | 0.14413         | 0.04571        | 3.153         | 0.0773         |
| lichens vs. freshwater fishes         | -0.27802        | 0.09613        | -2.892        | 0.17996        |
| <b>mammals vs. freshwater fishes</b>  | <b>-0.30095</b> | <b>0.07277</b> | <b>-4.136</b> | <b>0.00188</b> |
| molluscs vs. freshwater fishes        | 0.01491         | 0.0808         | 0.185         | 1              |
| mosses vs. freshwater fishes          | 0.06065         | 0.10175        | 0.596         | 1              |
| reptiles vs. freshwater fishes        | -0.15358        | 0.07029        | -2.185        | 1              |
| vascular plants vs. freshwater fishes | -0.06202        | 0.05091        | -1.218        | 1              |
| mammals vs. lichens                   | -0.02293        | 0.10256        | -0.224        | 1              |
| molluscs vs. lichens                  | 0.29293         | 0.1084         | 2.702         | 0.32091        |
| mosses vs. lichens                    | 0.33867         | 0.1248         | 2.714         | 0.31024        |
| reptiles vs. lichens                  | 0.12445         | 0.10081        | 1.234         | 1              |
| vascular plants vs. lichens           | 0.216           | 0.0884         | 2.443         | 0.67081        |
| <b>molluscs vs. mammals</b>           | <b>0.31586</b>  | <b>0.08836</b> | <b>3.575</b>  | <b>0.01737</b> |
| <b>mosses vs. mammals</b>             | <b>0.3616</b>   | <b>0.10785</b> | <b>3.353</b>  | <b>0.03885</b> |
| reptiles vs. mammals                  | 0.14737         | 0.07886        | 1.869         | 1              |

| comparison                         | Estimate       | Std. Error     | t value      | Pr(> t )       |
|------------------------------------|----------------|----------------|--------------|----------------|
| <b>vascular plants vs. mammals</b> | <b>0.23893</b> | <b>0.06221</b> | <b>3.841</b> | <b>0.00627</b> |
| mosses vs. molluscs                | 0.04574        | 0.11342        | 0.403        | 1              |
| reptiles vs. molluscs              | -0.16849       | 0.08632        | -1.952       | 1              |
| vascular plants vs. molluscs       | -0.07693       | 0.07143        | -1.077       | 1              |
| reptiles vs. mosses                | -0.21423       | 0.10619        | -2.017       | 1              |
| vascular plants vs. mosses         | -0.12267       | 0.09448        | -1.298       | 1              |
| vascular plants vs. reptiles       | 0.09156        | 0.05929        | 1.544        | 1              |

Figure S3b: Proportion of occupied cells that contain one or more sources of pollution category 9.2 –Industrial and Military Effluents, by taxonomic group

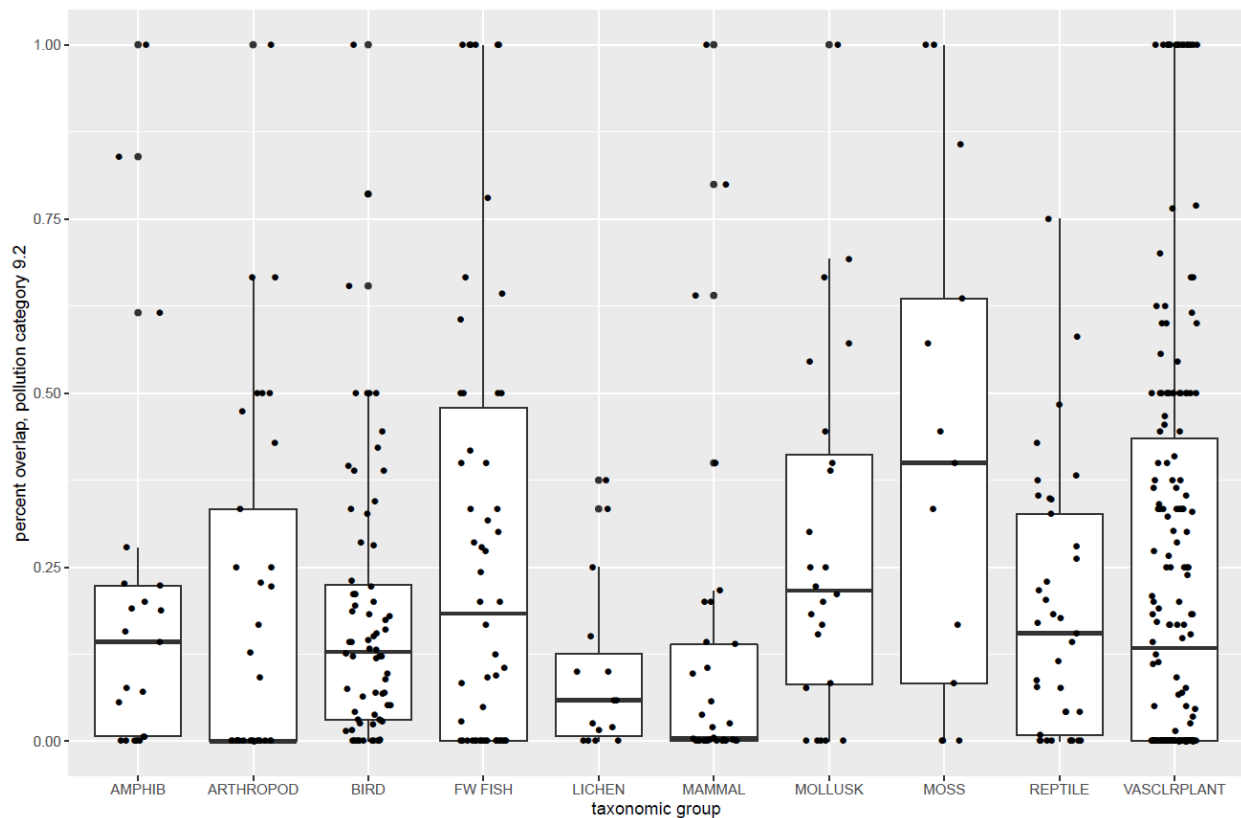

Table S3f. Analysis of Variance Table for effect of taxonomic group on percent geographic overlap with pollution sources, category 9.2 only

|                 | degrees of freedom | sum of squares | mean square | F value | p(>F)    |
|-----------------|--------------------|----------------|-------------|---------|----------|
| taxonomic group | 9                  | 4.311          | 0.47901     | 4.416   | 1.44e-05 |
| residuals       | 478                | 51.849         | 0.10847     |         |          |

Table S3g. Results of Tukey’s post-hoc pairwise comparison of means, with Bonferroni correction, for differences between taxonomic groups in the percent geographic overlap with pollution sources – category 9.2 only. Pairs with significant differences ( $Pr(>|t|) < 0.05$ ) are bold.

| comparison                            | Estimate        | Std. Error      | t value      | Pr(> t )      |
|---------------------------------------|-----------------|-----------------|--------------|---------------|
| arthropods vs. amphibians             | -0.00975        | 0.07745         | -0.126       | 1             |
| birds vs. amphibians                  | -0.02409        | 0.068811        | -0.35        | 1             |
| freshwater fishes vs. amphibians      | 0.081729        | 0.071354        | 1.145        | 1             |
| lichens vs. amphibians                | -0.10463        | 0.093797        | -1.116       | 1             |
| mammals vs. amphibians                | -0.07971        | 0.07745         | -1.029       | 1             |
| molluscs vs. amphibians               | 0.079755        | 0.082905        | 0.962        | 1             |
| mosses vs. amphibians                 | 0.218749        | 0.097915        | 2.234        | 1             |
| reptiles vs. amphibians               | -0.01778        | 0.075804        | -0.234       | 1             |
| vascular plants vs. amphibians        | 0.046946        | 0.063872        | 0.735        | 1             |
| birds vs. arthropods                  | -0.01434        | 0.058326        | -0.246       | 1             |
| freshwater fishes vs. arthropods      | 0.09148         | 0.061305        | 1.492        | 1             |
| lichens vs. arthropods                | -0.09488        | 0.086399        | -1.098       | 1             |
| mammals vs. arthropods                | -0.06996        | 0.068304        | -1.024       | 1             |
| molluscs vs. arthropods               | 0.089507        | 0.074433        | 1.203        | 1             |
| mosses vs. arthropods                 | 0.228501        | 0.090853        | 2.515        | 0.5503        |
| reptiles vs. arthropods               | -0.00802        | 0.066433        | -0.121       | 1             |
| vascular plants vs. arthropods        | 0.056697        | 0.052408        | 1.082        | 1             |
| freshwater fishes vs. birds           | 0.105822        | 0.049947        | 2.119        | 1             |
| lichens vs. birds                     | -0.08054        | 0.078748        | -1.023       | 1             |
| mammals vs. birds                     | -0.05562        | 0.058326        | -0.954       | 1             |
| molluscs vs. birds                    | 0.103848        | 0.065397        | 1.588        | 1             |
| mosses vs. birds                      | 0.242843        | 0.083611        | 2.904        | 0.1732        |
| reptiles vs. birds                    | 0.006318        | 0.056123        | 0.113        | 1             |
| vascular plants vs. birds             | 0.071039        | 0.03851         | 1.845        | 1             |
| lichens vs. freshwater fishes         | -0.18636        | 0.080979        | -2.301       | 0.981         |
| mammals vs. freshwater fishes         | -0.16144        | 0.061305        | -2.633       | 0.3928        |
| molluscs vs. freshwater fishes        | -0.00197        | 0.068067        | -0.029       | 1             |
| mosses vs. freshwater fishes          | 0.137021        | 0.085716        | 1.599        | 1             |
| reptiles vs. freshwater fishes        | -0.0995         | 0.059213        | -1.68        | 1             |
| vascular plants vs. freshwater fishes | -0.03478        | 0.042889        | -0.811       | 1             |
| mammals vs. lichens                   | 0.024922        | 0.086399        | 0.288        | 1             |
| molluscs vs. lichens                  | 0.184388        | 0.091321        | 2.019        | 1             |
| mosses vs. lichens                    | 0.323383        | 0.105136        | 3.076        | 0.0999        |
| reptiles vs. lichens                  | 0.086858        | 0.084927        | 1.023        | 1             |
| vascular plants vs. lichens           | 0.151579        | 0.074471        | 2.035        | 1             |
| molluscs vs. mammals                  | 0.159466        | 0.074433        | 2.142        | 1             |
| <b>mosses vs. mammals</b>             | <b>0.298461</b> | <b>0.090853</b> | <b>3.285</b> | <b>0.0492</b> |
| reptiles vs. mammals                  | 0.061936        | 0.066433        | 0.932        | 1             |

| comparison                   | Estimate | Std. Error | t value | Pr(> t ) |
|------------------------------|----------|------------|---------|----------|
| vascular plants vs. mammals  | 0.126657 | 0.052408   | 2.417   | 0.7215   |
| mosses vs. molluscs          | 0.138994 | 0.095547   | 1.455   | 1        |
| reptiles vs. molluscs        | -0.09753 | 0.072719   | -1.341  | 1        |
| vascular plants vs. molluscs | -0.03281 | 0.060178   | -0.545  | 1        |
| reptiles vs. mosses          | -0.23653 | 0.089455   | -2.644  | 0.3807   |
| vascular plants vs. mosses   | -0.1718  | 0.079596   | -2.158  | 1        |
| vascular plants vs. reptiles | 0.064722 | 0.049944   | 1.296   | 1        |

Figure S3c: Proportion of occupied cells that contain one or more sources of pollution category

### 9.3 – Agricultural and Forestry Effluents, by taxonomic group

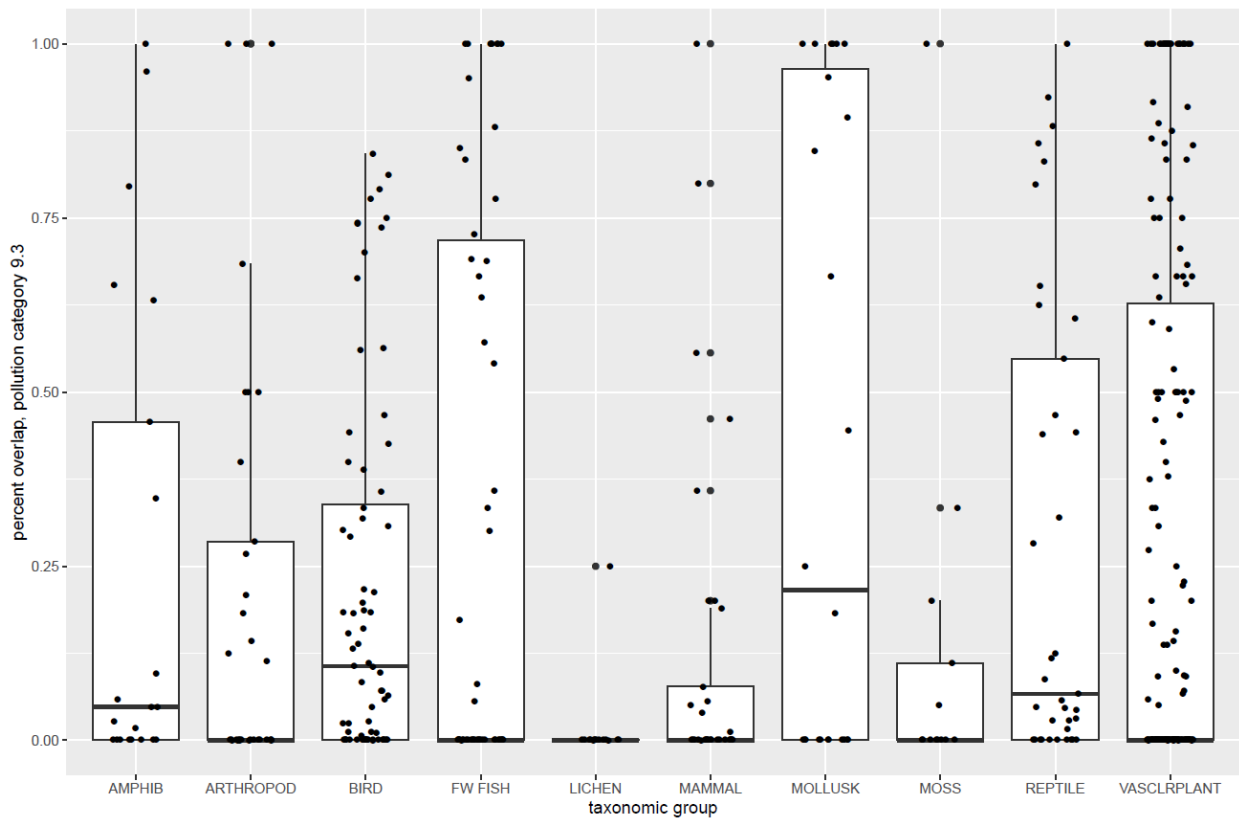

Table S3h. Analysis of Variance Table for effect of taxonomic group on percent geographic overlap with pollution sources, category 9.3 only

|                 | degrees of freedom | sum of squares | mean square | F value | p(>F)    |
|-----------------|--------------------|----------------|-------------|---------|----------|
| taxonomic group | 9                  | 3.186          | 0.35400     | 2.8768  | 0.002561 |
| residuals       | 478                | 58.820         | 0.12305     |         |          |

Table S3i. Results of Tukey’s post-hoc pairwise comparison of means, with Bonferroni correction, for differences between taxonomic groups in the percent geographic overlap with pollution sources – category 9.3 only. Pairs with significant differences ( $Pr(>|t|)<0.05$ ) are bold.

| comparison                            | Estimate        | Std. Error      | t value     | Pr(> t )      |
|---------------------------------------|-----------------|-----------------|-------------|---------------|
| arthropods vs. amphibians             | -0.03528        | 0.097922        | -0.36       | 1             |
| birds vs. amphibians                  | -0.02814        | 0.086999        | -0.323      | 1             |
| freshwater fishes vs. amphibians      | 0.090806        | 0.090214        | 1.007       | 1             |
| lichens vs. amphibians                | -0.22798        | 0.118589        | -1.922      | 1             |
| mammals vs. amphibians                | -0.12346        | 0.097922        | -1.261      | 1             |
| molluscs vs. amphibians               | 0.181865        | 0.104819        | 1.735       | 1             |
| mosses vs. amphibians                 | -0.1143         | 0.123796        | -0.923      | 1             |
| reptiles vs. amphibians               | 0.035621        | 0.095841        | 0.372       | 1             |
| vascular plants vs. amphibians        | 0.05051         | 0.080755        | 0.625       | 1             |
| birds vs. arthropods                  | 0.007141        | 0.073743        | 0.097       | 1             |
| freshwater fishes vs. arthropods      | 0.126083        | 0.077509        | 1.627       | 1             |
| lichens vs. arthropods                | -0.1927         | 0.109236        | -1.764      | 1             |
| mammals vs. arthropods                | -0.08818        | 0.086359        | -1.021      | 1             |
| molluscs vs. arthropods               | 0.217143        | 0.094107        | 2.307       | 0.9656        |
| mosses vs. arthropods                 | -0.07902        | 0.114868        | -0.688      | 1             |
| reptiles vs. arthropods               | 0.070898        | 0.083992        | 0.844       | 1             |
| vascular plants vs. arthropods        | 0.085788        | 0.066261        | 1.295       | 1             |
| freshwater fishes vs. birds           | 0.118943        | 0.06315         | 1.884       | 1             |
| lichens vs. birds                     | -0.19984        | 0.099563        | -2.007      | 1             |
| mammals vs. birds                     | -0.09533        | 0.073743        | -1.293      | 1             |
| molluscs vs. birds                    | 0.210003        | 0.082682        | 2.54        | 0.5132        |
| mosses vs. birds                      | -0.08616        | 0.105711        | -0.815      | 1             |
| reptiles vs. birds                    | 0.063758        | 0.070957        | 0.899       | 1             |
| vascular plants vs. birds             | 0.078647        | 0.04869         | 1.615       | 1             |
| lichens vs. freshwater fishes         | -0.31878        | 0.102384        | -3.114      | 0.0882        |
| mammals vs. freshwater fishes         | -0.21427        | 0.077509        | -2.764      | 0.2665        |
| molluscs vs. freshwater fishes        | 0.09106         | 0.086058        | 1.058       | 1             |
| mosses vs. freshwater fishes          | -0.20511        | 0.108372        | -1.893      | 1             |
| reptiles vs. freshwater fishes        | -0.05519        | 0.074864        | -0.737      | 1             |
| vascular plants vs. freshwater fishes | -0.0403         | 0.054225        | -0.743      | 1             |
| mammals vs. lichens                   | 0.104514        | 0.109236        | 0.957       | 1             |
| <b>molluscs vs. lichens</b>           | <b>0.409842</b> | <b>0.115459</b> | <b>3.55</b> | <b>0.0191</b> |
| mosses vs. lichens                    | 0.113675        | 0.132926        | 0.855       | 1             |
| reptiles vs. lichens                  | 0.263597        | 0.107375        | 2.455       | 0.6501        |
| vascular plants vs. lichens           | 0.278487        | 0.094155        | 2.958       | 0.1464        |
| molluscs vs. mammals                  | 0.305328        | 0.094107        | 3.244       | 0.0567        |
| mosses vs. mammals                    | 0.009161        | 0.114868        | 0.08        | 1             |
| reptiles vs. mammals                  | 0.159083        | 0.083992        | 1.894       | 1             |



| comparison                   | Estimate | Std. Error | t value | Pr(> t ) |
|------------------------------|----------|------------|---------|----------|
| vascular plants vs. mammals  | 0.173972 | 0.066261   | 2.626   | 0.4017   |
| mosses vs. molluscs          | -0.29617 | 0.120801   | -2.452  | 0.6559   |
| reptiles vs. molluscs        | -0.14625 | 0.09194    | -1.591  | 1        |
| vascular plants vs. molluscs | -0.13136 | 0.076084   | -1.726  | 1        |
| reptiles vs. mosses          | 0.149922 | 0.113099   | 1.326   | 1        |
| vascular plants vs. mosses   | 0.164811 | 0.100634   | 1.638   | 1        |
| vascular plants vs. reptiles | 0.01489  | 0.063146   | 0.236   | 1        |

Figure S3d: Proportion of occupied cells that contain one or more sources of pollution category

9.4 –Garbage and Solid Waste, by taxonomic group

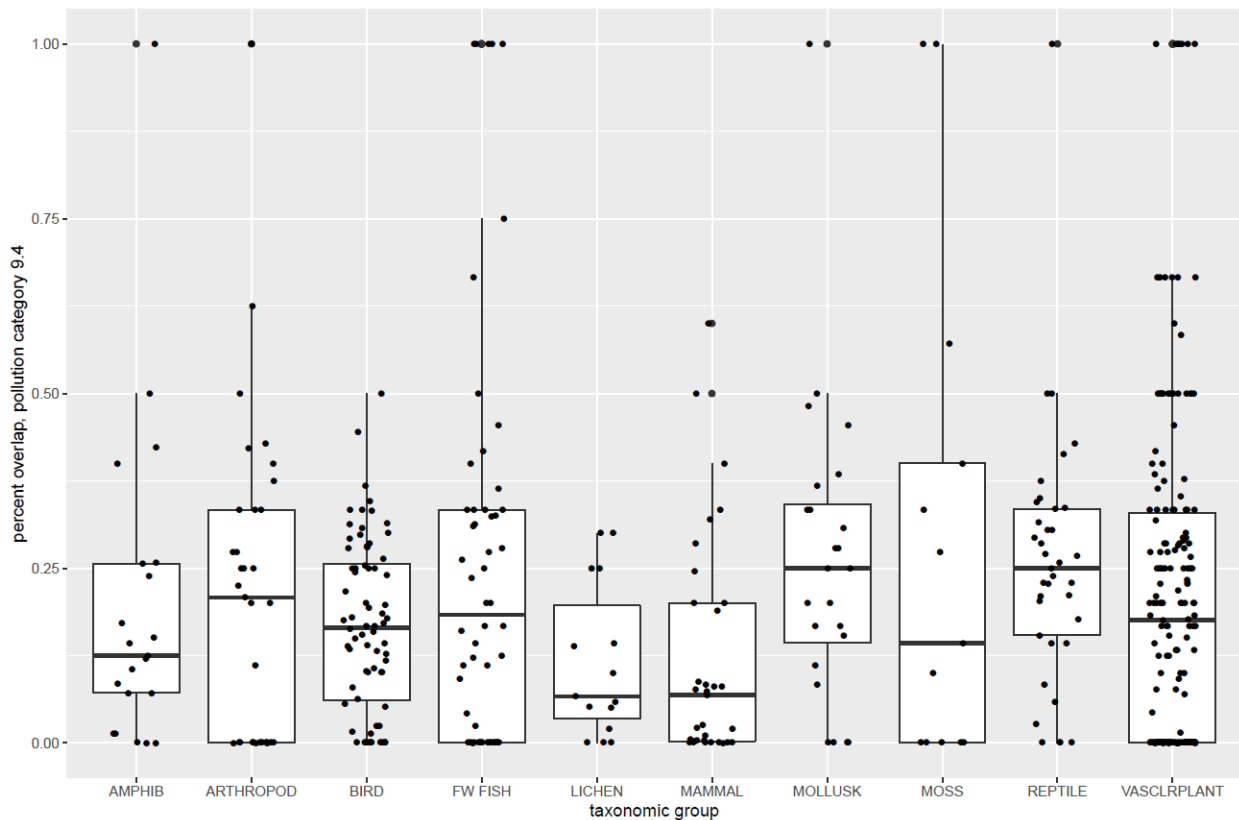

Table S3j. Analysis of Variance Table for effect of taxonomic group on percent geographic overlap with pollution sources, category 9.4 only

|                 | degrees of freedom | sum of squares | mean square | F value | p(>F)   |
|-----------------|--------------------|----------------|-------------|---------|---------|
| taxonomic group | 9                  | 0.9302         | 0.103351    | 2.0306  | 0.03442 |
| residuals       | 478                | 24.3288        | 0.050897    |         |         |

Table S3k. Results of Tukey’s post-hoc pairwise comparison of means, with Bonferroni correction, for differences between taxonomic groups in the percent geographic overlap with pollution sources – category 9.4 only. Pairs with significant differences ( $\Pr(>|t|) < 0.05$ ) are bold.

| comparison                            | Estimate | Std. Error | t value | Pr(> t ) |
|---------------------------------------|----------|------------|---------|----------|
| arthropods vs. amphibians             | 0.014466 | 0.062976   | 0.23    | 1        |
| birds vs. amphibians                  | -0.03026 | 0.055952   | -0.541  | 1        |
| freshwater fishes vs. amphibians      | 0.06409  | 0.058019   | 1.105   | 1        |
| lichens vs. amphibians                | -0.08214 | 0.076268   | -1.077  | 1        |
| mammals vs. amphibians                | -0.07873 | 0.062976   | -1.25   | 1        |
| molluscs vs. amphibians               | 0.065176 | 0.067412   | 0.967   | 1        |
| mosses vs. amphibians                 | 0.096524 | 0.079617   | 1.212   | 1        |
| reptiles vs. amphibians               | 0.058441 | 0.061638   | 0.948   | 1        |
| vascular plants vs. amphibians        | 0.018181 | 0.051936   | 0.35    | 1        |
| birds vs. arthropods                  | -0.04473 | 0.047426   | -0.943  | 1        |
| freshwater fishes vs. arthropods      | 0.049624 | 0.049849   | 0.996   | 1        |
| lichens vs. arthropods                | -0.09661 | 0.070253   | -1.375  | 1        |
| mammals vs. arthropods                | -0.09319 | 0.05554    | -1.678  | 1        |
| molluscs vs. arthropods               | 0.050711 | 0.060523   | 0.838   | 1        |
| mosses vs. arthropods                 | 0.082058 | 0.073875   | 1.111   | 1        |
| reptiles vs. arthropods               | 0.043975 | 0.054018   | 0.814   | 1        |
| vascular plants vs. arthropods        | 0.003716 | 0.042614   | 0.087   | 1        |
| freshwater fishes vs. birds           | 0.09435  | 0.040613   | 2.323   | 0.927    |
| lichens vs. birds                     | -0.05188 | 0.064032   | -0.81   | 1        |
| mammals vs. birds                     | -0.04847 | 0.047426   | -1.022  | 1        |
| molluscs vs. birds                    | 0.095436 | 0.053175   | 1.795   | 1        |
| mosses vs. birds                      | 0.126784 | 0.067986   | 1.865   | 1        |
| reptiles vs. birds                    | 0.088701 | 0.045634   | 1.944   | 1        |
| vascular plants vs. birds             | 0.048441 | 0.031314   | 1.547   | 1        |
| lichens vs. freshwater fishes         | -0.14623 | 0.065846   | -2.221  | 1        |
| mammals vs. freshwater fishes         | -0.14282 | 0.049849   | -2.865  | 0.196    |
| molluscs vs. freshwater fishes        | 0.001086 | 0.055347   | 0.02    | 1        |
| mosses vs. freshwater fishes          | 0.032434 | 0.069697   | 0.465   | 1        |
| reptiles vs. freshwater fishes        | -0.00565 | 0.048147   | -0.117  | 1        |
| vascular plants vs. freshwater fishes | -0.04591 | 0.034874   | -1.316  | 1        |
| mammals vs. lichens                   | 0.003417 | 0.070253   | 0.049   | 1        |
| molluscs vs. lichens                  | 0.147319 | 0.074255   | 1.984   | 1        |
| mosses vs. lichens                    | 0.178667 | 0.085489   | 2.09    | 1        |
| reptiles vs. lichens                  | 0.140584 | 0.069056   | 2.036   | 1        |
| vascular plants vs. lichens           | 0.100324 | 0.060554   | 1.657   | 1        |
| molluscs vs. mammals                  | 0.143902 | 0.060523   | 2.378   | 0.802    |
| mosses vs. mammals                    | 0.17525  | 0.073875   | 2.372   | 0.813    |
| reptiles vs. mammals                  | 0.137167 | 0.054018   | 2.539   | 0.514    |

| comparison                   | Estimate | Std. Error | t value | Pr(> t ) |
|------------------------------|----------|------------|---------|----------|
| vascular plants vs. mammals  | 0.096907 | 0.042614   | 2.274   | 1        |
| mosses vs. molluscs          | 0.031348 | 0.077691   | 0.403   | 1        |
| reptiles vs. molluscs        | -0.00674 | 0.05913    | -0.114  | 1        |
| vascular plants vs. molluscs | -0.047   | 0.048932   | -0.96   | 1        |
| reptiles vs. mosses          | -0.03808 | 0.072738   | -0.524  | 1        |
| vascular plants vs. mosses   | -0.07834 | 0.064721   | -1.21   | 1        |
| vascular plants vs. reptiles | -0.04026 | 0.040611   | -0.991  | 1        |

Figure S3e: Proportion of occupied cells that contain one or more sources of pollution category

9.5 – Air-borne Pollutants, by taxonomic group

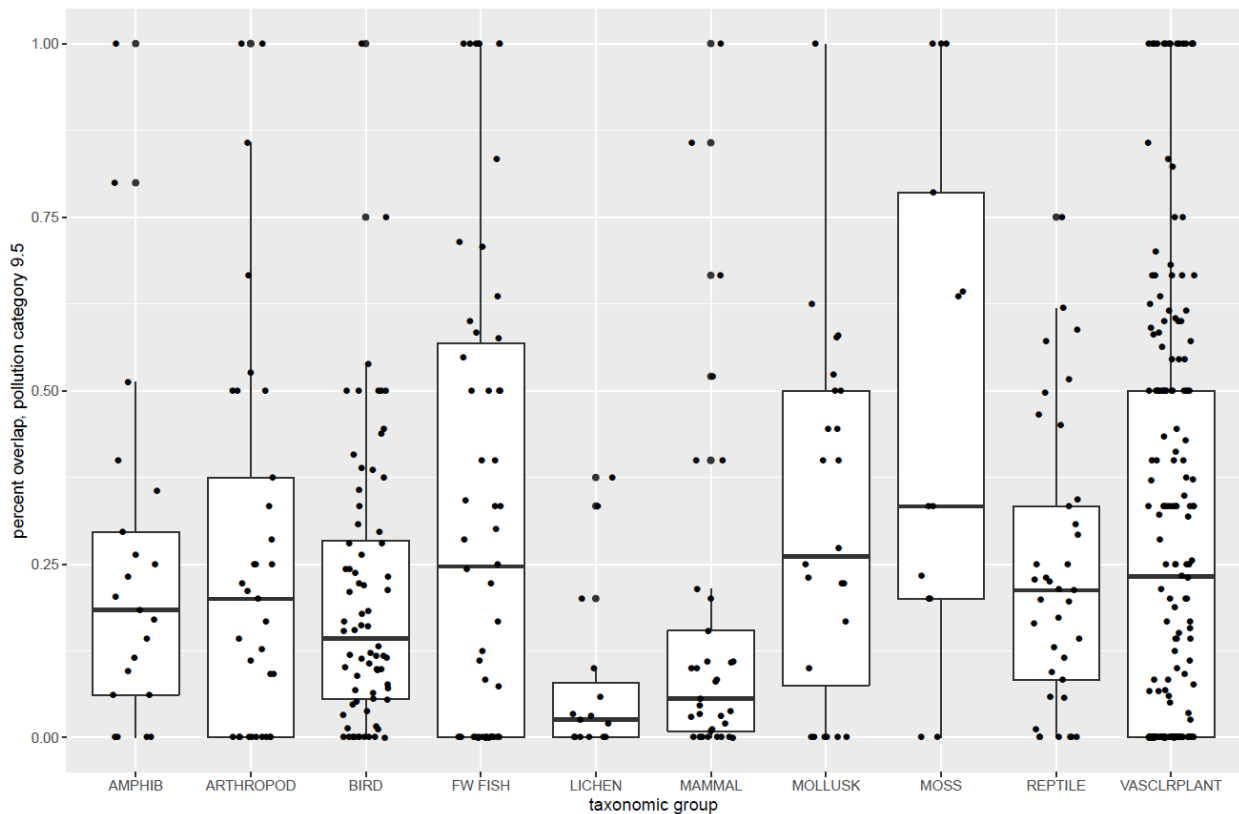

Table S31. Analysis of Variance Table for effect of taxonomic group on percent geographic overlap with pollution sources, category 9.5 only

|                 | degrees of freedom | sum of squares | mean square | F value | p(>F)   |
|-----------------|--------------------|----------------|-------------|---------|---------|
| taxonomic group | 9                  | 2.431          | 0.270091    | 3.2749  | 0.00698 |
| residuals       | 478                | 39.422         | 0.082474    |         |         |

Table S3m. Results of Tukey’s post-hoc pairwise comparison of means, with Bonferroni correction, for differences between taxonomic groups in the percent geographic overlap with pollution sources – category 9.4 only. Pairs with significant differences ( $\Pr(>|t|) < 0.05$ ) are bold.

| comparison                            | Estimate        | Std. Error      | t value      | Pr(> t )       |
|---------------------------------------|-----------------|-----------------|--------------|----------------|
| arthropods vs. amphibians             | 0.017377        | 0.080166        | 0.217        | 1              |
| birds vs. amphibians                  | -0.04568        | 0.071224        | -0.641       | 1              |
| freshwater fishes vs. amphibians      | 0.085932        | 0.073855        | 1.164        | 1              |
| lichens vs. amphibians                | -0.16648        | 0.097085        | -1.715       | 1              |
| mammals vs. amphibians                | -0.08199        | 0.080166        | -1.023       | 1              |
| molluscs vs. amphibians               | 0.065818        | 0.085812        | 0.767        | 1              |
| mosses vs. amphibians                 | 0.244672        | 0.101348        | 2.414        | 0.72657        |
| reptiles vs. amphibians               | -0.00802        | 0.078462        | -0.102       | 1              |
| vascular plants vs. amphibians        | 0.059414        | 0.066111        | 0.899        | 1              |
| birds vs. arthropods                  | -0.06305        | 0.060371        | -1.044       | 1              |
| freshwater fishes vs. arthropods      | 0.068555        | 0.063455        | 1.08         | 1              |
| lichens vs. arthropods                | -0.18386        | 0.089429        | -2.056       | 1              |
| mammals vs. arthropods                | -0.09937        | 0.070699        | -1.405       | 1              |
| molluscs vs. arthropods               | 0.048442        | 0.077043        | 0.629        | 1              |
| mosses vs. arthropods                 | 0.227295        | 0.094039        | 2.417        | 0.72096        |
| reptiles vs. arthropods               | -0.0254         | 0.068762        | -0.369       | 1              |
| vascular plants vs. arthropods        | 0.042037        | 0.054246        | 0.775        | 1              |
| freshwater fishes vs. birds           | 0.131608        | 0.051699        | 2.546        | 0.50489        |
| lichens vs. birds                     | -0.1208         | 0.081509        | -1.482       | 1              |
| mammals vs. birds                     | -0.03631        | 0.060371        | -0.601       | 1              |
| molluscs vs. birds                    | 0.111495        | 0.06769         | 1.647        | 1              |
| <b>mosses vs. birds</b>               | <b>0.290348</b> | <b>0.086543</b> | <b>3.355</b> | <b>0.03856</b> |
| reptiles vs. birds                    | 0.037653        | 0.05809         | 0.648        | 1              |
| vascular plants vs. birds             | 0.10509         | 0.039861        | 2.636        | 0.38929        |
| lichens vs. freshwater fishes         | -0.25241        | 0.083819        | -3.011       | 0.12322        |
| mammals vs. freshwater fishes         | -0.16792        | 0.063455        | -2.646       | 0.37827        |
| molluscs vs. freshwater fishes        | -0.02011        | 0.070454        | -0.285       | 1              |
| mosses vs. freshwater fishes          | 0.15874         | 0.088721        | 1.789        | 1              |
| reptiles vs. freshwater fishes        | -0.09396        | 0.061289        | -1.533       | 1              |
| vascular plants vs. freshwater fishes | -0.02652        | 0.044393        | -0.597       | 1              |
| mammals vs. lichens                   | 0.08449         | 0.089429        | 0.945        | 1              |
| molluscs vs. lichens                  | 0.232297        | 0.094523        | 2.458        | 0.6454         |
| <b>mosses vs. lichens</b>             | <b>0.41115</b>  | <b>0.108823</b> | <b>3.778</b> | <b>0.00801</b> |
| reptiles vs. lichens                  | 0.158455        | 0.087905        | 1.803        | 1              |
| vascular plants vs. lichens           | 0.225892        | 0.077082        | 2.931        | 0.15956        |
| molluscs vs. mammals                  | 0.147807        | 0.077043        | 1.919        | 1              |
| <b>mosses vs. mammals</b>             | <b>0.32666</b>  | <b>0.094039</b> | <b>3.474</b> | <b>0.02520</b> |
| reptiles vs. mammals                  | 0.073965        | 0.068762        | 1.076        | 1              |

| comparison                   | Estimate | Std. Error | t value | Pr(> t ) |
|------------------------------|----------|------------|---------|----------|
| vascular plants vs. mammals  | 0.141402 | 0.054246   | 2.607   | 0.42424  |
| mosses vs. molluscs          | 0.178853 | 0.098897   | 1.808   | 1        |
| reptiles vs. molluscs        | -0.07384 | 0.075269   | -0.981  | 1        |
| vascular plants vs. molluscs | -0.00641 | 0.062288   | -0.103  | 1        |
| reptiles vs. mosses          | -0.2527  | 0.092591   | -2.729  | 0.29628  |
| vascular plants vs. mosses   | -0.18526 | 0.082387   | -2.249  | 1        |
| vascular plants vs. reptiles | 0.067437 | 0.051696   | 1.305   | 1        |

Figure S3f: Proportion of occupied cells that contain one or more sources of pollution category

9.6 – *Excess Energy*, by taxonomic group

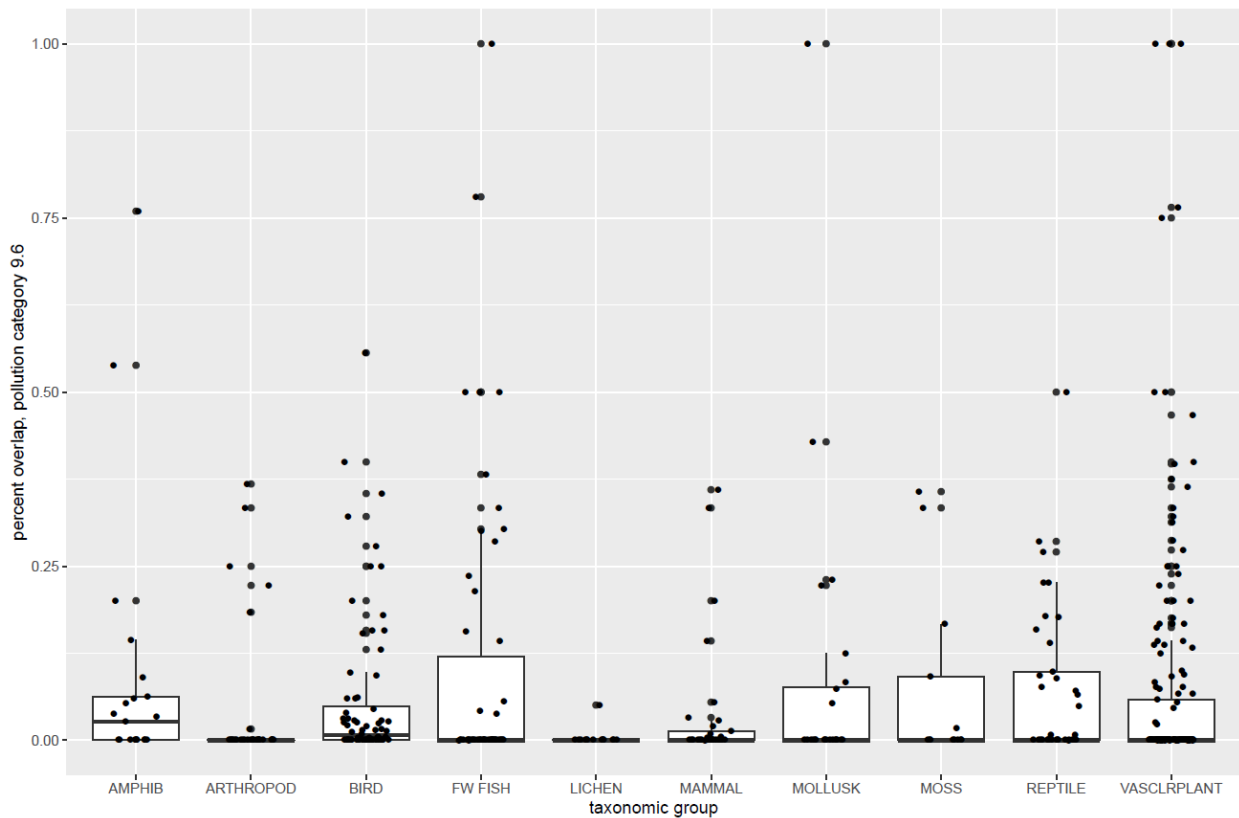

Table S3n. Analysis of Variance Table for effect of taxonomic group on percent geographic overlap with pollution sources, category 9.6 only

|                 | degrees of freedom | sum of squares | mean square | F value | p(>F)  |
|-----------------|--------------------|----------------|-------------|---------|--------|
| taxonomic group | 9                  | 0.2418         | 0.026870    | 1.0618  | 0.3898 |
| residuals       | 478                | 12.0963        | 0.025306    |         |        |

Table S3o. Results of Tukey's post-hoc pairwise comparison of means, with Bonferroni correction, for differences between taxonomic groups in the percent geographic overlap with pollution sources – category 9.4 only. Pairs with significant differences ( $\Pr(>|t|) < 0.05$ ) are bold.

| comparison                            | Estimate | Std. Error | t value | Pr(> t ) |
|---------------------------------------|----------|------------|---------|----------|
| arthropods vs. amphibians             | -0.05398 | 0.044406   | -1.216  | 1        |
| birds vs. amphibians                  | -0.03726 | 0.039453   | -0.945  | 1        |
| freshwater fishes vs. amphibians      | 0.011202 | 0.040911   | 0.274   | 1        |
| lichens vs. amphibians                | -0.09227 | 0.053779   | -1.716  | 1        |
| mammals vs. amphibians                | -0.05924 | 0.044406   | -1.334  | 1        |
| molluscs vs. amphibians               | -0.00324 | 0.047534   | -0.068  | 1        |
| mosses vs. amphibians                 | -0.02139 | 0.05614    | -0.381  | 1        |
| reptiles vs. amphibians               | -0.02212 | 0.043463   | -0.509  | 1        |
| vascular plants vs. amphibians        | -0.02244 | 0.036621   | -0.613  | 1        |
| birds vs. arthropods                  | 0.01672  | 0.033441   | 0.5     | 1        |
| freshwater fishes vs. arthropods      | 0.065187 | 0.03515    | 1.855   | 1        |
| lichens vs. arthropods                | -0.03828 | 0.049537   | -0.773  | 1        |
| mammals vs. arthropods                | -0.00525 | 0.039163   | -0.134  | 1        |
| molluscs vs. arthropods               | 0.050744 | 0.042676   | 1.189   | 1        |
| mosses vs. arthropods                 | 0.032594 | 0.052091   | 0.626   | 1        |
| reptiles vs. arthropods               | 0.031869 | 0.038089   | 0.837   | 1        |
| vascular plants vs. arthropods        | 0.031548 | 0.030048   | 1.05    | 1        |
| freshwater fishes vs. birds           | 0.048467 | 0.028638   | 1.692   | 1        |
| lichens vs. birds                     | -0.055   | 0.04515    | -1.218  | 1        |
| mammals vs. birds                     | -0.02197 | 0.033441   | -0.657  | 1        |
| molluscs vs. birds                    | 0.034023 | 0.037495   | 0.907   | 1        |
| mosses vs. birds                      | 0.015874 | 0.047939   | 0.331   | 1        |
| reptiles vs. birds                    | 0.015148 | 0.032178   | 0.471   | 1        |
| vascular plants vs. birds             | 0.014828 | 0.02208    | 0.672   | 1        |
| lichens vs. freshwater fishes         | -0.10347 | 0.04643    | -2.229  | 1        |
| mammals vs. freshwater fishes         | -0.07044 | 0.03515    | -2.004  | 1        |
| molluscs vs. freshwater fishes        | -0.01444 | 0.039026   | -0.37   | 1        |
| mosses vs. freshwater fishes          | -0.03259 | 0.049145   | -0.663  | 1        |
| reptiles vs. freshwater fishes        | -0.03332 | 0.03395    | -0.981  | 1        |
| vascular plants vs. freshwater fishes | -0.03364 | 0.02459    | -1.368  | 1        |
| mammals vs. lichens                   | 0.033028 | 0.049537   | 0.667   | 1        |
| molluscs vs. lichens                  | 0.089025 | 0.052359   | 1.7     | 1        |
| mosses vs. lichens                    | 0.070876 | 0.06028    | 1.176   | 1        |
| reptiles vs. lichens                  | 0.07015  | 0.048693   | 1.441   | 1        |
| vascular plants vs. lichens           | 0.06983  | 0.042698   | 1.635   | 1        |
| molluscs vs. mammals                  | 0.055997 | 0.042676   | 1.312   | 1        |
| mosses vs. mammals                    | 0.037848 | 0.052091   | 0.727   | 1        |
| reptiles vs. mammals                  | 0.037123 | 0.038089   | 0.975   | 1        |

| <b>comparison</b>            | <b>Estimate</b> | <b>Std. Error</b> | <b>t value</b> | <b>Pr(&gt; t )</b> |
|------------------------------|-----------------|-------------------|----------------|--------------------|
| vascular plants vs. mammals  | 0.036802        | 0.030048          | 1.225          | 1                  |
| mosses vs. molluscs          | -0.01815        | 0.054782          | -0.331         | 1                  |
| reptiles vs. molluscs        | -0.01887        | 0.041694          | -0.453         | 1                  |
| vascular plants vs. molluscs | -0.0192         | 0.034503          | -0.556         | 1                  |
| reptiles vs. mosses          | -0.00073        | 0.051289          | -0.014         | 1                  |
| vascular plants vs. mosses   | -0.00105        | 0.045636          | -0.023         | 1                  |
| vascular plants vs. reptiles | -0.00032        | 0.028636          | -0.011         | 1                  |
