# Supplementary material for: Are we accurately estimating the potential role of pollution in the decline of species at risk in Canada?
Source: Atypon-hosted journal article supplement (doi:10.1139/facets-2019-0025), 2019-06-01
Supplement: facets-2019-0025_supplement4.pdf [file facets-2019-0025_supplement4.pdf]

**Are we accurately estimating the potential role of pollution in the decline of species at risk in Canada?**

**Supplementary Material 4:** ANOVA and Tukey’s post-hoc test for differences between taxonomic groups in Threats Calculator scope (scope<sub>TC</sub>) of pollution (pollution overall and each category separately).

Table S4a. Analysis of Variance Table for effect of taxonomic group on assessed scope of pollution as a whole

|                 | degrees of freedom | sum of squares | mean square | F value | p(>F)    |
|-----------------|--------------------|----------------|-------------|---------|----------|
| taxonomic group | 9                  | 27011          | 3001.21     | 3.1955  | 0.001957 |
| residuals       | 99                 | 92980          | 939.19      |         |          |

Table S4b. Results of Tukey’s post-hoc pairwise comparison of means, with Bonferroni correction, for differences between taxonomic groups in the assessed scope of pollution (all categories). Pairs with significant differences ( $\Pr(>|t|) < 0.05$ ) are bold.

| <b>comparison</b>                | <b>Estimate</b> | <b>Std. Error</b> | <b>t value</b> | <b>Pr(&gt; t )</b> |
|----------------------------------|-----------------|-------------------|----------------|--------------------|
| arthropods vs. amphibians        | -20.325         | 13.417            | -1.515         | 1                  |
| birds vs. amphibians             | 10.375          | 14.537            | 0.714          | 1                  |
| freshwater fishes vs. amphibians | 3.942           | 13.417            | 0.294          | 1                  |
| lichens vs. amphibians           | -9.125          | 17.471            | -0.522         | 1                  |
| mammals vs. amphibians           | -23.433         | 13.771            | -1.702         | 1                  |
| molluscs vs. amphibians          | 5.075           | 14.537            | 0.349          | 1                  |
| mosses vs. amphibians            | -37.792         | 20.748            | -1.821         | 1                  |
| reptiles vs. amphibians          | -1.51           | 13.771            | -0.11          | 1                  |
| vascular plants vs. amphibians   | -33.89          | 13.139            | -2.579         | 0.5118             |
| birds vs. arthropods             | 30.7            | 12.511            | 2.454          | 0.7147             |
| freshwater fishes vs. arthropods | 24.267          | 11.19             | 2.169          | 1                  |
| lichens vs. arthropods           | 11.2            | 15.826            | 0.708          | 1                  |
| mammals vs. arthropods           | -3.108          | 11.613            | -0.268         | 1                  |
| molluscs vs. arthropods          | 25.4            | 12.511            | 2.03           | 1                  |
| mosses vs. arthropods            | -17.467         | 19.382            | -0.901         | 1                  |
| reptiles vs. arthropods          | 18.815          | 11.613            | 1.62           | 1                  |
| vascular plants vs. arthropods   | -13.565         | 10.856            | -1.249         | 1                  |
| freshwater fishes vs. birds      | -6.433          | 12.511            | -0.514         | 1                  |
| lichens vs. birds                | -19.5           | 16.786            | -1.162         | 1                  |
| mammals vs. birds                | -33.808         | 12.89             | -2.623         | 0.4546             |

| comparison                                   | Estimate       | Std. Error    | t value       | Pr(> t )      |
|----------------------------------------------|----------------|---------------|---------------|---------------|
| molluscs vs. birds                           | -5.3           | 13.705        | -0.387        | 1             |
| mosses vs. birds                             | -48.167        | 20.174        | -2.388        | 0.8486        |
| reptiles vs. birds                           | -11.885        | 12.89         | -0.922        | 1             |
| <b>vascular plants vs. birds</b>             | <b>-44.265</b> | <b>12.213</b> | <b>-3.624</b> | <b>0.0207</b> |
| lichens vs. freshwater fishes                | -13.067        | 15.826        | -0.826        | 1             |
| mammals vs. freshwater fishes                | -27.374        | 11.613        | -2.357        | 0.917         |
| molluscs vs. freshwater fishes               | 1.133          | 12.511        | 0.091         | 1             |
| mosses vs. freshwater fishes                 | -41.733        | 19.382        | -2.153        | 1             |
| reptiles vs. freshwater fishes               | -5.451         | 11.613        | -0.469        | 1             |
| <b>vascular plants vs. freshwater fishes</b> | <b>-37.831</b> | <b>10.856</b> | <b>-3.485</b> | <b>0.0331</b> |
| mammals vs. lichens                          | -14.308        | 16.127        | -0.887        | 1             |
| molluscs vs. lichens                         | 14.2           | 16.786        | 0.846         | 1             |
| mosses vs. lichens                           | -28.667        | 22.381        | -1.281        | 1             |
| reptiles vs. lichens                         | 7.615          | 16.127        | 0.472         | 1             |
| vascular plants vs. lichens                  | -24.765        | 15.591        | -1.588        | 1             |
| molluscs vs. mammals                         | 28.508         | 12.89         | 2.212         | 1             |
| mosses vs. mammals                           | -14.359        | 19.629        | -0.732        | 1             |
| reptiles vs. mammals                         | 21.923         | 12.02         | 1.824         | 1             |
| vascular plants vs. mammals                  | -10.457        | 11.291        | -0.926        | 1             |
| mosses vs. molluscs                          | -42.867        | 20.174        | -2.125        | 1             |
| reptiles vs. molluscs                        | -6.585         | 12.89         | -0.511        | 1             |
| vascular plants vs. molluscs                 | -38.965        | 12.213        | -3.19         | 0.0857        |
| reptiles vs. mosses                          | 36.282         | 19.629        | 1.848         | 1             |
| vascular plants vs. mosses                   | 3.902          | 19.191        | 0.203         | 1             |
| vascular plants vs. reptiles                 | -32.38         | 11.291        | -2.868        | 0.2274        |

Figure S4a: Assessed scope of pollution category 9.1 – *Household Sewage and Urban Waste Water*, by taxonomic group

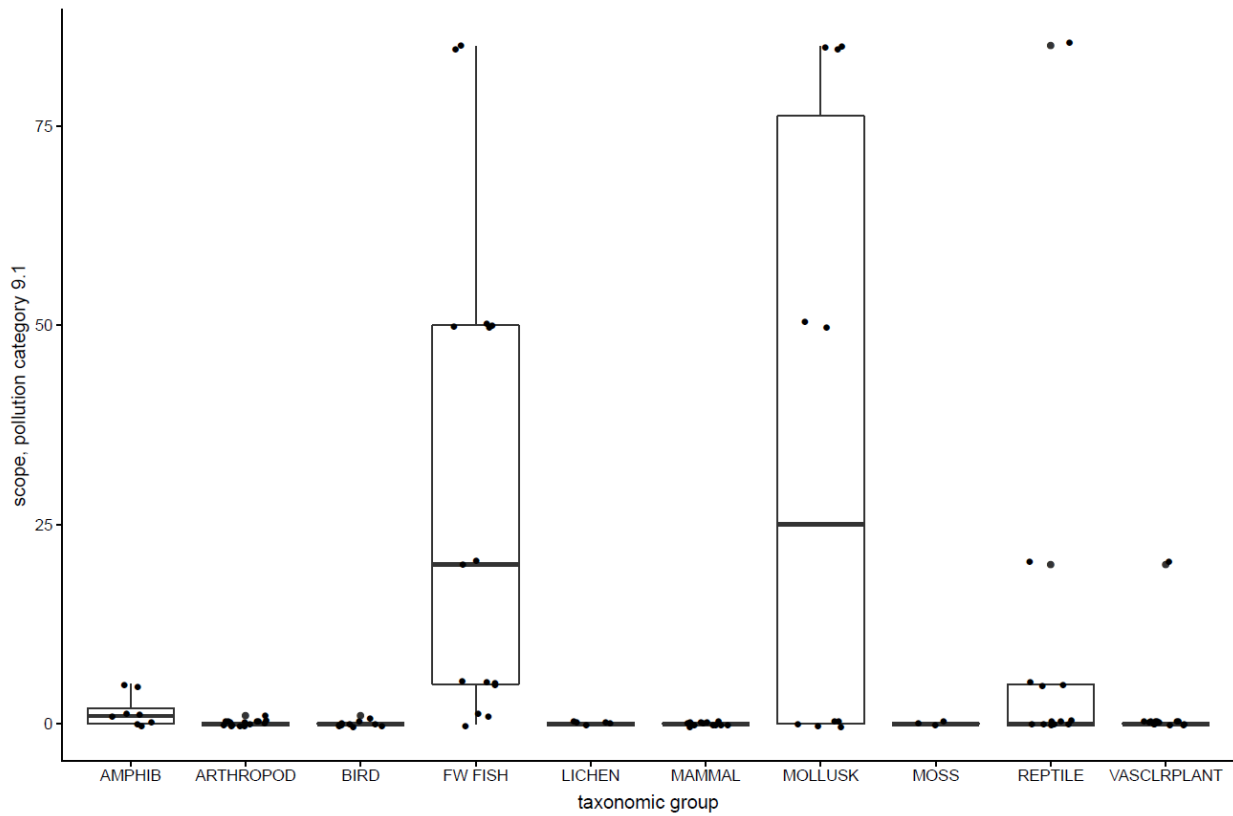

Table S4c. Analysis of Variance Table for effect of taxonomic group on assessed scope of pollution category 9.1

|                 | degrees of freedom | sum of squares | mean square | F value | p(>F)     |
|-----------------|--------------------|----------------|-------------|---------|-----------|
| taxonomic group | 9                  | 18056          | 2006.16     | 5.844   | 1.666e-06 |
| residuals       | 99                 | 33985          | 342.29      |         |           |

Table S4d. Results of Tukey's post-hoc pairwise comparison of means, with Bonferroni correction, for differences between taxonomic groups in the scope of pollution category 9.1.

Pairs with significant differences ( $\Pr(>|t|) < 0.05$ ) are bold.

| comparison                                   | Estimate      | Std. Error   | t value       | Pr(> t )        |
|----------------------------------------------|---------------|--------------|---------------|-----------------|
| arthropods vs. amphibians                    | -1.56         | 8.11         | -0.192        | 1               |
| birds vs. amphibians                         | -1.53         | 8.79         | -0.174        | 1               |
| freshwater fishes vs. amphibians             | 27.17         | 8.11         | 3.35          | 0.051478        |
| lichens vs. amphibians                       | -1.63         | 10.56        | -0.154        | 1               |
| mammals vs. amphibians                       | -1.63         | 8.33         | -0.195        | 1               |
| <b>molluscs vs. amphibians</b>               | <b>33.87</b>  | <b>8.79</b>  | <b>3.854</b>  | <b>0.009281</b> |
| mosses vs. amphibians                        | -1.63         | 12.54        | -0.13         | 1               |
| reptiles vs. amphibians                      | 7.61          | 8.33         | 0.914         | 1               |
| vascular plants vs. amphibians               | -0.45         | 7.94         | -0.056        | 1               |
| birds vs. arthropods                         | 0.03          | 7.56         | 0.004         | 1               |
| <b>freshwater fishes vs. arthropods</b>      | <b>28.73</b>  | <b>6.77</b>  | <b>4.247</b>  | <b>0.002203</b> |
| lichens vs. arthropods                       | -0.07         | 9.57         | -0.007        | 1               |
| mammals vs. arthropods                       | -0.07         | 7.02         | -0.009        | 1               |
| <b>molluscs vs. arthropods</b>               | <b>35.43</b>  | <b>7.56</b>  | <b>4.684</b>  | <b>0.000403</b> |
| mosses vs. arthropods                        | -0.07         | 11.72        | -0.006        | 1               |
| reptiles vs. arthropods                      | 9.16          | 7.02         | 1.305         | 1               |
| vascular plants vs. arthropods               | 1.11          | 6.56         | 0.169         | 1               |
| <b>freshwater fishes vs. birds</b>           | <b>28.70</b>  | <b>7.56</b>  | <b>3.794</b>  | <b>0.011479</b> |
| lichens vs. birds                            | -0.10         | 10.15        | -0.01         | 1               |
| mammals vs. birds                            | -0.10         | 7.79         | -0.013        | 1               |
| <b>molluscs vs. birds</b>                    | <b>35.40</b>  | <b>8.29</b>  | <b>4.272</b>  | <b>0.002003</b> |
| mosses vs. birds                             | -0.10         | 12.20        | -0.008        | 1               |
| reptiles vs. birds                           | 9.13          | 7.79         | 1.172         | 1               |
| vascular plants vs. birds                    | 1.08          | 7.38         | 0.146         | 1               |
| lichens vs. freshwater fishes                | -28.80        | 9.57         | -3.01         | 0.149101        |
| <b>mammals vs. freshwater fishes</b>         | <b>-28.80</b> | <b>7.02</b>  | <b>-4.102</b> | <b>0.003785</b> |
| molluscs vs. freshwater fishes               | 6.70          | 7.56         | 0.886         | 1               |
| mosses vs. freshwater fishes                 | -28.80        | 11.72        | -2.458        | 0.707398        |
| reptiles vs. freshwater fishes               | -19.57        | 7.02         | -2.787        | 0.286764        |
| <b>vascular plants vs. freshwater fishes</b> | <b>-27.62</b> | <b>6.56</b>  | <b>-4.209</b> | <b>0.002546</b> |
| mammals vs. lichens                          | 0.00          | 9.75         | 0             | 1               |
| <b>molluscs vs. lichens</b>                  | <b>35.50</b>  | <b>10.15</b> | <b>3.498</b>  | <b>0.031652</b> |
| mosses vs. lichens                           | 0.00          | 13.53        | 0             | 1               |
| reptiles vs. lichens                         | 9.23          | 9.75         | 0.947         | 1               |
| vascular plants vs. lichens                  | 1.18          | 9.43         | 0.125         | 1               |
| <b>molluscs vs. mammals</b>                  | <b>35.50</b>  | <b>7.79</b>  | <b>4.555</b>  | <b>0.000672</b> |
| mosses vs. mammals                           | 0.00          | 11.87        | 0             | 1               |
| reptiles vs. mammals                         | 9.23          | 7.27         | 1.27          | 1               |

| comparison                          | Estimate      | Std. Error  | t value       | Pr(> t )        |
|-------------------------------------|---------------|-------------|---------------|-----------------|
| vascular plants vs. mammals         | 1.18          | 6.83        | 0.172         | 1               |
| mosses vs. molluscs                 | -35.50        | 12.20       | -2.911        | 0.200504        |
| <b>reptiles vs. molluscs</b>        | <b>-26.27</b> | <b>7.79</b> | <b>-3.371</b> | <b>0.048153</b> |
| <b>vascular plants vs. molluscs</b> | <b>-34.32</b> | <b>7.38</b> | <b>-4.648</b> | <b>0.000465</b> |
| reptiles vs. mosses                 | 9.23          | 11.87       | 0.778         | 1               |
| vascular plants vs. mosses          | 1.18          | 11.60       | 0.101         | 1               |
| vascular plants vs. reptiles        | -8.05         | 6.83        | -1.18         | 1               |

Figure S4b: Assessed scope of pollution category 9.2 – *Industrial and Military Effluents*, by taxonomic group

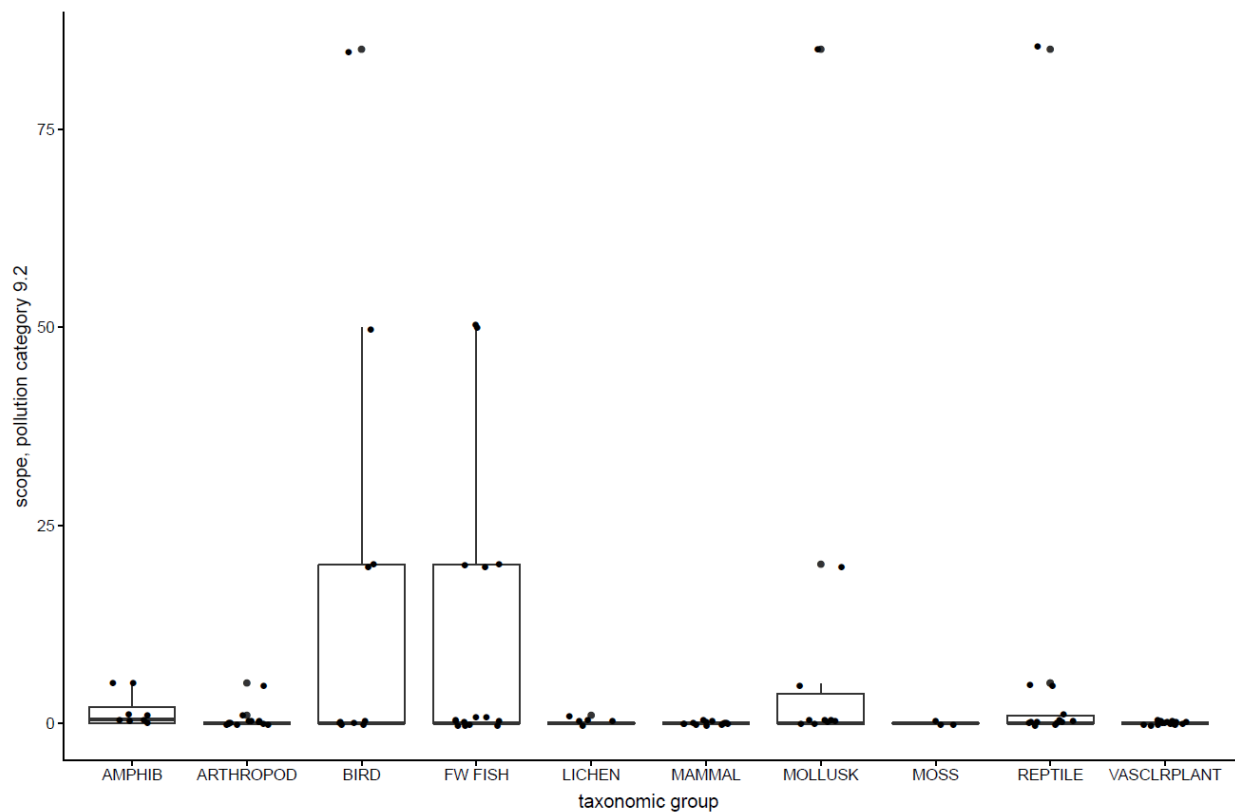

Table S4d. Analysis of Variance Table for effect of taxonomic group on assessed scope of pollution category 9.2

|                 | degrees of freedom | sum of squares | mean square | F value | p(>F)   |
|-----------------|--------------------|----------------|-------------|---------|---------|
| taxonomic group | 9                  | 3854           | 428.22      | 1.6971  | 0.09964 |
| residuals       | 99                 | 24980          | 525.33      |         |         |

Table S4e. Results of Tukey's post-hoc pairwise comparison of means, with Bonferroni correction, for differences between taxonomic groups in the scope of pollution category 9.2.

Pairs with significant differences ( $\Pr(>|t|) < 0.05$ ) are bold.

| comparison                            | Estimate | Std. Error | t value | Pr(> t ) |
|---------------------------------------|----------|------------|---------|----------|
| arthropods vs. amphibians             | -1.10    | 6.95       | -0.158  | 1        |
| birds vs. amphibians                  | 16.00    | 7.54       | 2.123   | 1        |
| freshwater fishes vs. amphibians      | 9.30     | 6.95       | 1.337   | 1        |
| lichens vs. amphibians                | -1.30    | 9.06       | -0.144  | 1        |
| mammals vs. amphibians                | -1.50    | 7.14       | -0.21   | 1        |
| molluscs vs. amphibians               | 9.50     | 7.54       | 1.261   | 1        |
| mosses vs. amphibians                 | -1.50    | 10.75      | -0.139  | 1        |
| reptiles vs. amphibians               | 5.89     | 7.14       | 0.824   | 1        |
| vascular plants vs. amphibians        | -1.50    | 6.81       | -0.22   | 1        |
| birds vs. arthropods                  | 17.10    | 6.49       | 2.637   | 0.437    |
| freshwater fishes vs. arthropods      | 10.40    | 5.80       | 1.793   | 1        |
| lichens vs. arthropods                | -0.20    | 8.20       | -0.024  | 1        |
| mammals vs. arthropods                | -0.40    | 6.02       | -0.066  | 1        |
| <b>molluscs vs. arthropods</b>        | 10.60    | 6.49       | 1.635   | 1        |
| mosses vs. arthropods                 | -0.40    | 10.05      | -0.04   | 1        |
| reptiles vs. arthropods               | 6.99     | 6.02       | 1.16    | 1        |
| vascular plants vs. arthropods        | -0.40    | 5.63       | -0.071  | 1        |
| freshwater fishes vs. birds           | -6.70    | 6.49       | -1.033  | 1        |
| lichens vs. birds                     | -17.30   | 8.70       | -1.988  | 1        |
| mammals vs. birds                     | -17.50   | 6.68       | -2.619  | 0.459    |
| molluscs vs. birds                    | -6.50    | 7.10       | -0.915  | 1        |
| mosses vs. birds                      | -17.50   | 10.46      | -1.674  | 1        |
| reptiles vs. birds                    | -10.12   | 6.68       | -1.514  | 1        |
| vascular plants vs. birds             | -17.50   | 6.33       | -2.764  | 0.306    |
| lichens vs. freshwater fishes         | -10.60   | 8.20       | -1.292  | 1        |
| mammals vs. freshwater fishes         | -10.80   | 6.02       | -1.794  | 1        |
| molluscs vs. freshwater fishes        | 0.20     | 6.49       | 0.031   | 1        |
| mosses vs. freshwater fishes          | -10.80   | 10.05      | -1.075  | 1        |
| reptiles vs. freshwater fishes        | -3.42    | 6.02       | -0.567  | 1        |
| vascular plants vs. freshwater fishes | -10.80   | 5.63       | -1.919  | 1        |
| mammals vs. lichens                   | -0.20    | 8.36       | -0.024  | 1        |
| molluscs vs. lichens                  | 10.80    | 8.70       | 1.241   | 1        |
| mosses vs. lichens                    | -0.20    | 11.60      | -0.017  | 1        |
| reptiles vs. lichens                  | 7.19     | 8.36       | 0.859   | 1        |
| vascular plants vs. lichens           | -0.20    | 8.08       | -0.025  | 1        |
| molluscs vs. mammals                  | 11.00    | 6.68       | 1.646   | 1        |
| mosses vs. mammals                    | 0.00     | 10.17      | 0       | 1        |
| reptiles vs. mammals                  | 7.39     | 6.23       | 1.185   | 1        |

| comparison                   | Estimate | Std. Error | t value | Pr(> t ) |
|------------------------------|----------|------------|---------|----------|
| vascular plants vs. mammals  | 0.00     | 5.85       | 0       | 1        |
| mosses vs. molluscs          | -11.00   | 10.46      | -1.052  | 1        |
| reptiles vs. molluscs        | -3.62    | 6.68       | -0.541  | 1        |
| vascular plants vs. molluscs | -11.00   | 6.33       | -1.738  | 1        |
| reptiles vs. mosses          | 7.39     | 10.17      | 0.726   | 1        |
| vascular plants vs. mosses   | 0.00     | 9.95       | 0       | 1        |
| vascular plants vs. reptiles | -7.39    | 5.85       | -1.262  | 1        |

Figure S4c: Assessed scope of pollution category 9.3 –*Agricultural Effluents*, by taxonomic group

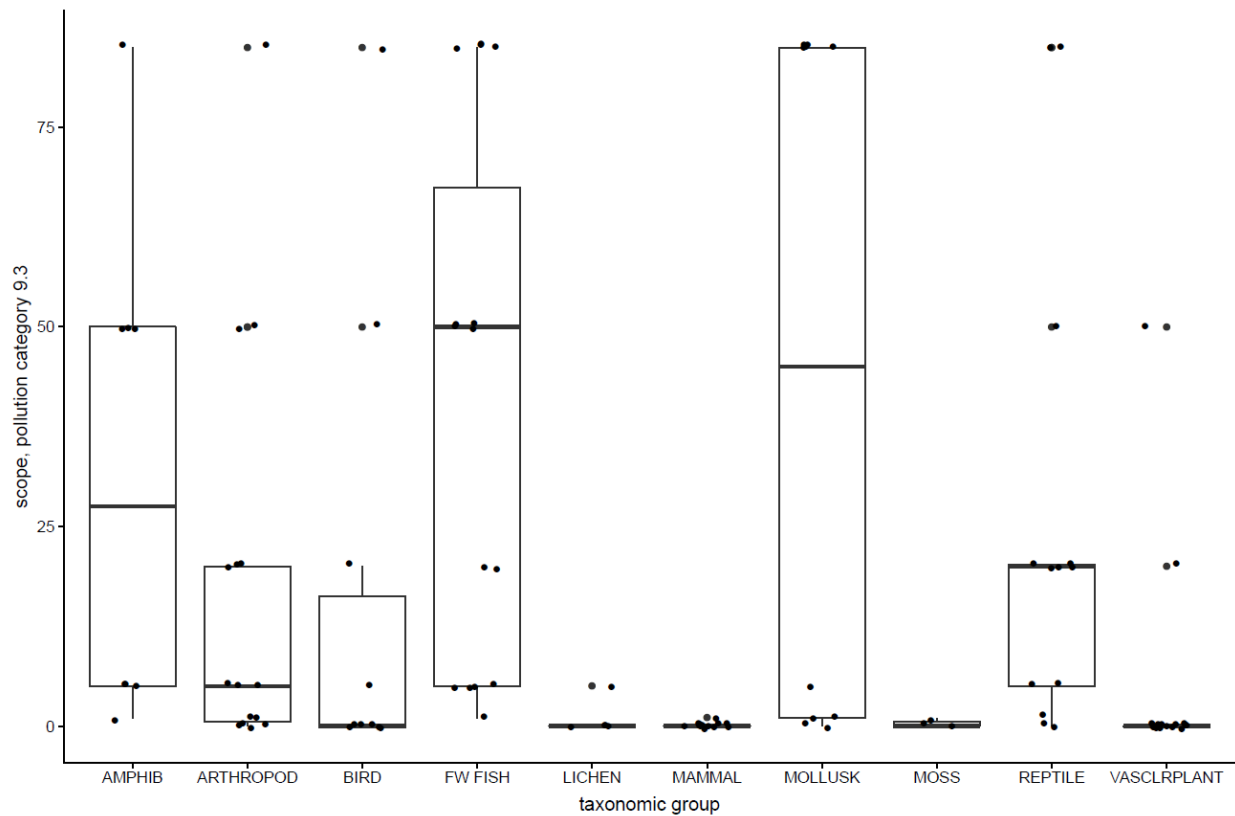

Table S4f. Analysis of Variance Table for effect of taxonomic group on assessed scope of pollution category 9.3

|                 | degrees of freedom | sum of squares | mean square | F value | p(>F)    |
|-----------------|--------------------|----------------|-------------|---------|----------|
| taxonomic group | 9                  | 25475          | 28630.59    | 4.0144  | 0.000213 |
| residuals       | 99                 | 69859          | 705.64      |         |          |

Table S4g. Results of Tukey's post-hoc pairwise comparison of means, with Bonferroni correction, for differences between taxonomic groups in the scope of pollution category 9.3.

Pairs with significant differences ( $\Pr(>|t|) < 0.05$ ) are bold.

| comparison                                   | Estimate      | Std. Error   | t value       | Pr(> t )       |
|----------------------------------------------|---------------|--------------|---------------|----------------|
| arthropods vs. amphibians                    | -13.91        | 11.63        | -1.196        | 1              |
| birds vs. amphibians                         | -15.38        | 12.60        | -1.22         | 1              |
| freshwater fishes vs. amphibians             | 8.69          | 11.63        | 0.747         | 1              |
| lichens vs. amphibians                       | -30.38        | 15.14        | -2.006        | 1              |
| mammals vs. amphibians                       | -31.30        | 11.94        | -2.622        | 0.45547        |
| molluscs vs. amphibians                      | 11.83         | 12.60        | 0.938         | 1              |
| mosses vs. amphibians                        | -31.04        | 17.98        | -1.726        | 1              |
| reptiles vs. amphibians                      | -5.91         | 11.94        | -0.495        | 1              |
| vascular plants vs. amphibians               | -27.26        | 11.39        | -2.393        | 0.83629        |
| birds vs. arthropods                         | -1.47         | 10.84        | -0.135        | 1              |
| freshwater fishes vs. arthropods             | 22.60         | 9.70         | 2.33          | 0.98277        |
| lichens vs. arthropods                       | -16.47        | 13.72        | -1.2          | 1              |
| mammals vs. arthropods                       | -17.39        | 10.07        | -1.728        | 1              |
| molluscs vs. arthropods                      | 25.73         | 10.84        | 2.373         | 0.88114        |
| mosses vs. arthropods                        | -17.13        | 16.80        | -1.02         | 1              |
| reptiles vs. arthropods                      | 7.99          | 10.07        | 0.794         | 1              |
| vascular plants vs. arthropods               | -13.35        | 9.41         | -1.419        | 1              |
| freshwater fishes vs. birds                  | 24.07         | 10.84        | 2.219         | 1              |
| lichens vs. birds                            | -15.00        | 14.55        | -1.031        | 1              |
| mammals vs. birds                            | -15.92        | 11.17        | -1.425        | 1              |
| molluscs vs. birds                           | 27.20         | 11.88        | 2.29          | 1              |
| mosses vs. birds                             | -15.67        | 17.49        | -0.896        | 1              |
| reptiles vs. birds                           | 9.46          | 11.17        | 0.847         | 1              |
| vascular plants vs. birds                    | -11.88        | 10.59        | -1.122        | 1              |
| lichens vs. freshwater fishes                | -39.07        | 13.72        | -2.848        | 0.24083        |
| <b>mammals vs. freshwater fishes</b>         | <b>-39.99</b> | <b>10.07</b> | <b>-3.973</b> | <b>0.00607</b> |
| molluscs vs. freshwater fishes               | 3.13          | 10.84        | 0.289         | 1              |
| mosses vs. freshwater fishes                 | -39.73        | 16.80        | -2.365        | 0.89908        |
| reptiles vs. freshwater fishes               | -14.61        | 10.07        | -1.451        | 1              |
| <b>vascular plants vs. freshwater fishes</b> | <b>-35.95</b> | <b>9.41</b>  | <b>-3.82</b>  | <b>0.01048</b> |
| mammals vs. lichens                          | -0.92         | 13.98        | -0.066        | 1              |
| molluscs vs. lichens                         | 42.20         | 14.55        | 2.9           | 0.20663        |
| mosses vs. lichens                           | -0.67         | 19.40        | -0.034        | 1              |
| reptiles vs. lichens                         | 24.46         | 13.98        | 1.75          | 1              |
| vascular plants vs. lichens                  | 3.12          | 13.51        | 0.231         | 1              |
| <b>molluscs vs. mammals</b>                  | <b>43.12</b>  | <b>11.17</b> | <b>3.859</b>  | <b>0.00912</b> |
| mosses vs. mammals                           | 0.26          | 17.01        | 0.015         | 1              |
| reptiles vs. mammals                         | 25.38         | 10.42        | 2.436         | 0.74808        |



| comparison                          | Estimate      | Std. Error   | t value       | Pr(> t )       |
|-------------------------------------|---------------|--------------|---------------|----------------|
| vascular plants vs. mammals         | 4.04          | 9.79         | 0.413         | 1              |
| mosses vs. molluscs                 | -42.87        | 17.49        | -2.451        | 0.7192         |
| reptiles vs. molluscs               | -17.74        | 11.17        | -1.588        | 1              |
| <b>vascular plants vs. molluscs</b> | <b>-39.08</b> | <b>10.59</b> | <b>-3.692</b> | <b>0.01641</b> |
| reptiles vs. mosses                 | 25.13         | 17.01        | 1.477         | 1              |
| vascular plants vs. mosses          | 3.78          | 16.64        | 0.227         | 1              |
| vascular plants vs. reptiles        | -21.34        | 9.79         | -2.181        | 1              |

Figure S4d: Assessed scope of pollution category 9.4 –*Garbage and Solid Waste*, by taxonomic group

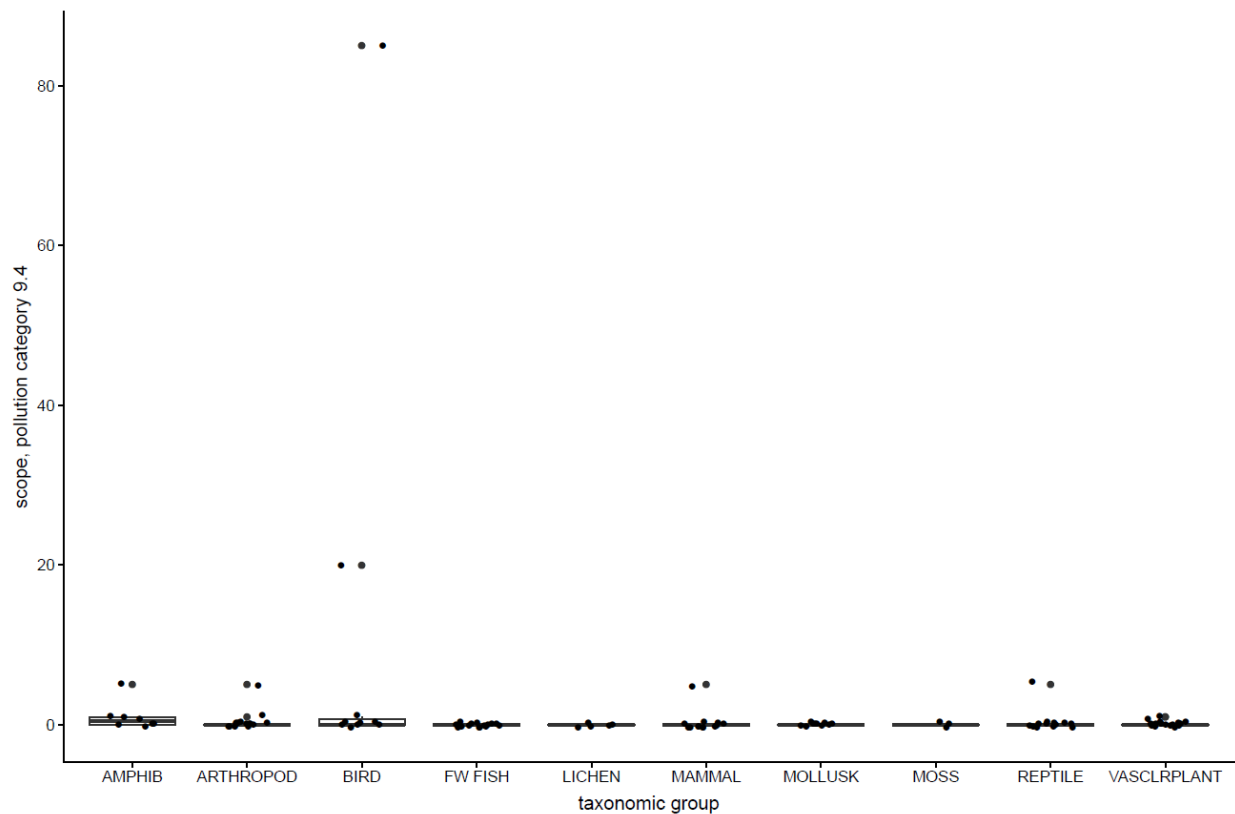

Table S4h. Analysis of Variance Table for effect of taxonomic group on assessed scope of pollution category 9.4

|                 | degrees of freedom | sum of squares | mean square | F value | p(>F)  |
|-----------------|--------------------|----------------|-------------|---------|--------|
| taxonomic group | 9                  | 978.2          | 108.692     | 1.6319  | 0.1164 |
| residuals       | 99                 | 6593.9         | 66.605      |         |        |

Table S4i. Results of Tukey’s post-hoc pairwise comparison of means, with Bonferroni correction, for differences between taxonomic groups in the scope of pollution category 9.4.

Pairs with significant differences ( $\Pr(>|t|) < 0.05$ ) are bold.

| comparison                            | Estimate | Std. Error | t value | Pr(> t ) |
|---------------------------------------|----------|------------|---------|----------|
| arthropods vs. amphibians             | -0.60    | 3.57       | -0.168  | 1        |
| birds vs. amphibians                  | 9.60     | 3.87       | 2.48    | 0.6674   |
| freshwater fishes vs. amphibians      | -1.00    | 3.57       | -0.28   | 1        |
| lichens vs. amphibians                | -1.00    | 4.65       | -0.215  | 1        |
| mammals vs. amphibians                | -0.62    | 3.67       | -0.168  | 1        |
| molluscs vs. amphibians               | -1.00    | 3.87       | -0.258  | 1        |
| mosses vs. amphibians                 | -1.00    | 5.53       | -0.181  | 1        |
| reptiles vs. amphibians               | -0.62    | 3.67       | -0.168  | 1        |
| vascular plants vs. amphibians        | -0.88    | 3.50       | -0.252  | 1        |
| birds vs. arthropods                  | 10.20    | 3.33       | 3.061   | 0.1276   |
| freshwater fishes vs. arthropods      | -0.40    | 2.98       | -0.134  | 1        |
| lichens vs. arthropods                | -0.40    | 4.21       | -0.095  | 1        |
| mammals vs. arthropods                | -0.02    | 3.09       | -0.005  | 1        |
| molluscs vs. arthropods               | -0.40    | 3.33       | -0.12   | 1        |
| mosses vs. arthropods                 | -0.40    | 5.16       | -0.077  | 1        |
| reptiles vs. arthropods               | -0.02    | 3.09       | -0.005  | 1        |
| vascular plants vs. arthropods        | -0.28    | 2.89       | -0.098  | 1        |
| freshwater fishes vs. birds           | -10.60   | 3.33       | -3.181  | 0.0881   |
| lichens vs. birds                     | -10.60   | 4.47       | -2.371  | 0.8847   |
| mammals vs. birds                     | -10.22   | 3.43       | -2.976  | 0.1652   |
| molluscs vs. birds                    | -10.60   | 3.65       | -2.904  | 0.2043   |
| mosses vs. birds                      | -10.60   | 5.37       | -1.973  | 1        |
| reptiles vs. birds                    | -10.22   | 3.43       | -2.976  | 0.1652   |
| vascular plants vs. birds             | -10.48   | 3.25       | -3.223  | 0.0773   |
| lichens vs. freshwater fishes         | 0.00     | 4.21       | 0       | 1        |
| mammals vs. freshwater fishes         | 0.38     | 3.09       | 0.124   | 1        |
| molluscs vs. freshwater fishes        | 0.00     | 3.33       | 0       | 1        |
| mosses vs. freshwater fishes          | 0.00     | 5.16       | 0       | 1        |
| reptiles vs. freshwater fishes        | 0.38     | 3.09       | 0.124   | 1        |
| vascular plants vs. freshwater fishes | 0.12     | 2.89       | 0.041   | 1        |
| mammals vs. lichens                   | 0.38     | 4.30       | 0.09    | 1        |
| molluscs vs. lichens                  | 0.00     | 4.47       | 0       | 1        |
| mosses vs. lichens                    | 0.00     | 5.96       | 0       | 1        |
| reptiles vs. lichens                  | 0.38     | 4.30       | 0.09    | 1        |
| vascular plants vs. lichens           | 0.12     | 4.15       | 0.028   | 1        |
| molluscs vs. mammals                  | -0.38    | 3.43       | -0.112  | 1        |
| mosses vs. mammals                    | -0.38    | 5.23       | -0.074  | 1        |
| reptiles vs. mammals                  | 0.00     | 3.20       | 0       | 1        |

| comparison                   | Estimate | Std. Error | t value | Pr(> t ) |
|------------------------------|----------|------------|---------|----------|
| vascular plants vs. mammals  | -0.27    | 3.01       | -0.089  | 1        |
| mosses vs. molluscs          | 0.00     | 5.37       | 0       | 1        |
| reptiles vs. molluscs        | 0.38     | 3.43       | 0.112   | 1        |
| vascular plants vs. molluscs | 0.12     | 3.25       | 0.036   | 1        |
| reptiles vs. mosses          | 0.38     | 5.23       | 0.074   | 1        |
| vascular plants vs. mosses   | 0.12     | 5.11       | 0.023   | 1        |
| vascular plants vs. reptiles | -0.27    | 3.01       | -0.089  | 1        |

Figure S4e: Assessed scope of pollution category 9.5 – *Air-borne Pollutants*, by taxonomic group

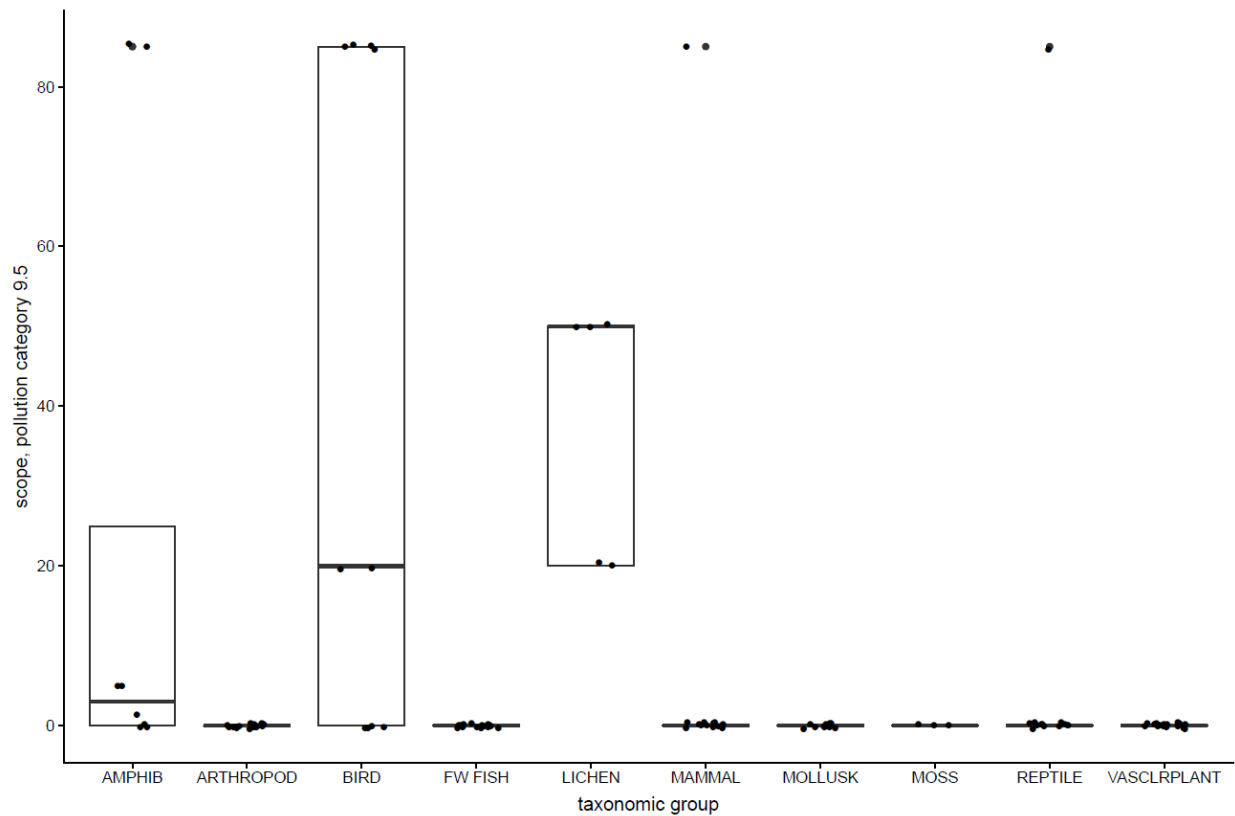

Table S4j. Analysis of Variance Table for effect of taxonomic group on assessed scope of pollution category 9.5

|                 | degrees of freedom | sum of squares | mean square | F value | p(>F)     |
|-----------------|--------------------|----------------|-------------|---------|-----------|
| taxonomic group | 9                  | 19085          | 2120.52     | 5.2372  | 8.061e-06 |
| residuals       | 99                 | 40084          | 404.89      |         |           |

Table S4k. Results of Tukey's post-hoc pairwise comparison of means, with Bonferroni correction, for differences between taxonomic groups in the scope of pollution category 9.5.

Pairs with significant differences ( $\Pr(>|t|) < 0.05$ ) are bold.

| comparison                            | Estimate      | Std. Error   | t value       | Pr(> t )        |
|---------------------------------------|---------------|--------------|---------------|-----------------|
| arthropods vs. amphibians             | -22.62        | 8.81         | -2.568        | 0.527111        |
| birds vs. amphibians                  | 15.38         | 9.55         | 1.611         | 1               |
| freshwater fishes vs. amphibians      | -22.62        | 8.81         | -2.568        | 0.527111        |
| lichens vs. amphibians                | 15.38         | 11.47        | 1.34          | 1               |
| mammals vs. amphibians                | -16.09        | 9.04         | -1.779        | 1               |
| molluscs vs. amphibians               | -22.62        | 9.55         | -2.37         | 0.886708        |
| mosses vs. amphibians                 | -22.62        | 13.62        | -1.661        | 1               |
| reptiles vs. amphibians               | -16.09        | 9.04         | -1.779        | 1               |
| vascular plants vs. amphibians        | -22.62        | 8.63         | -2.623        | 0.454823        |
| <b>birds vs. arthropods</b>           | <b>38.00</b>  | <b>8.22</b>  | <b>4.626</b>  | <b>0.000509</b> |
| freshwater fishes vs. arthropods      | 0.00          | 7.35         | 0             | 1               |
| <b>lichens vs. arthropods</b>         | <b>38.00</b>  | <b>10.39</b> | <b>3.657</b>  | <b>0.01849</b>  |
| mammals vs. arthropods                | 6.54          | 7.63         | 0.858         | 1               |
| molluscs vs. arthropods               | 0.00          | 8.22         | 0             | 1               |
| mosses vs. arthropods                 | 0.00          | 12.73        | 0             | 1               |
| reptiles vs. arthropods               | 6.54          | 7.63         | 0.858         | 1               |
| vascular plants vs. arthropods        | 0.00          | 7.13         | 0             | 1               |
| <b>freshwater fishes vs. birds</b>    | <b>-38.00</b> | <b>8.22</b>  | <b>-4.626</b> | <b>0.000509</b> |
| lichens vs. birds                     | 0.00          | 11.02        | 0             | 1               |
| <b>mammals vs. birds</b>              | <b>-31.46</b> | <b>8.46</b>  | <b>-3.717</b> | <b>0.015023</b> |
| <b>molluscs vs. birds</b>             | <b>-38.00</b> | <b>9.00</b>  | <b>-4.223</b> | <b>0.002414</b> |
| mosses vs. birds                      | -38.00        | 13.25        | -2.869        | 0.22664         |
| <b>reptiles vs. birds</b>             | <b>-31.46</b> | <b>8.46</b>  | <b>-3.717</b> | <b>0.015023</b> |
| <b>vascular plants vs. birds</b>      | <b>-38.00</b> | <b>8.02</b>  | <b>-4.739</b> | <b>0.000324</b> |
| <b>lichens vs. freshwater fishes</b>  | <b>38.00</b>  | <b>10.39</b> | <b>3.657</b>  | <b>0.01849</b>  |
| mammals vs. freshwater fishes         | 6.54          | 7.63         | 0.858         | 1               |
| molluscs vs. freshwater fishes        | 0.00          | 8.22         | 0             | 1               |
| mosses vs. freshwater fishes          | 0.00          | 12.73        | 0             | 1               |
| reptiles vs. freshwater fishes        | 6.54          | 7.63         | 0.858         | 1               |
| vascular plants vs. freshwater fishes | 0.00          | 7.13         | 0             | 1               |
| mammals vs. lichens                   | -31.46        | 10.59        | -2.971        | 0.167553        |
| <b>molluscs vs. lichens</b>           | <b>-38.00</b> | <b>11.02</b> | <b>-3.448</b> | <b>0.037397</b> |
| mosses vs. lichens                    | -38.00        | 14.69        | -2.586        | 0.50256         |
| reptiles vs. lichens                  | -31.46        | 10.59        | -2.971        | 0.167553        |
| <b>vascular plants vs. lichens</b>    | <b>-38.00</b> | <b>10.24</b> | <b>-3.712</b> | <b>0.015296</b> |
| molluscs vs. mammals                  | -6.54         | 8.46         | -0.773        | 1               |
| mosses vs. mammals                    | -6.54         | 12.89        | -0.507        | 1               |
| reptiles vs. mammals                  | 0.00          | 7.89         | 0             | 1               |

| comparison                   | Estimate | Std. Error | t value | Pr(> t ) |
|------------------------------|----------|------------|---------|----------|
| vascular plants vs. mammals  | -6.54    | 7.41       | -0.882  | 1        |
| mosses vs. molluscs          | 0.00     | 13.25      | 0       | 1        |
| reptiles vs. molluscs        | 6.54     | 8.46       | 0.773   | 1        |
| vascular plants vs. molluscs | 0.00     | 8.02       | 0       | 1        |
| reptiles vs. mosses          | 6.54     | 12.89      | 0.507   | 1        |
| vascular plants vs. mosses   | 0.00     | 12.60      | 0       | 1        |
| vascular plants vs. reptiles | -6.54    | 7.41       | -0.882  | 1        |

Figure S4f: Assessed scope of pollution category 9.6 – *Excess Energy*, by taxonomic group

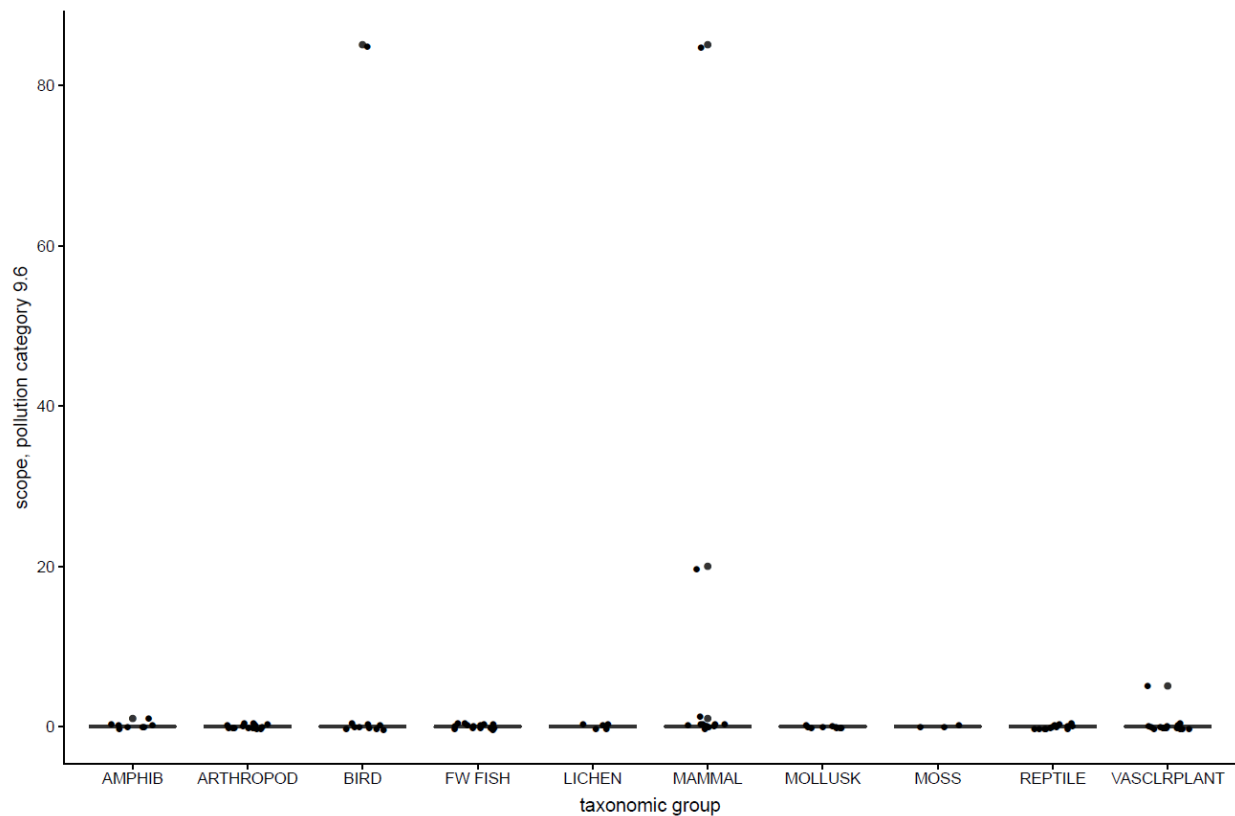

Table S4l. Analysis of Variance Table for effect of taxonomic group on assessed scope of pollution category 9.6

|                 | degrees of freedom | sum of squares | mean square | F value | p(>F)  |
|-----------------|--------------------|----------------|-------------|---------|--------|
| taxonomic group | 9                  | 1232.4         | 136.93      | 1.0201  | 0.4294 |
| residuals       | 99                 | 13288.6        | 134.23      |         |        |

Table S4m. Results of Tukey's post-hoc pairwise comparison of means, with Bonferroni correction, for differences between taxonomic groups in the scope of pollution category 9.6.

Pairs with significant differences ( $\Pr(>|t|) < 0.05$ ) are bold.

| comparison                            | Estimate | Std. Error | t value | Pr(> t ) |
|---------------------------------------|----------|------------|---------|----------|
| arthropods vs. amphibians             | -0.13    | 5.07       | -0.025  | 1        |
| birds vs. amphibians                  | 8.38     | 5.50       | 1.524   | 1        |
| freshwater fishes vs. amphibians      | -0.13    | 5.07       | -0.025  | 1        |
| lichens vs. amphibians                | -0.13    | 6.61       | -0.019  | 1        |
| mammals vs. amphibians                | 8.03     | 5.21       | 1.542   | 1        |
| molluscs vs. amphibians               | -0.13    | 5.50       | -0.023  | 1        |
| mosses vs. amphibians                 | -0.13    | 7.84       | -0.016  | 1        |
| reptiles vs. amphibians               | -0.13    | 5.21       | -0.024  | 1        |
| vascular plants vs. amphibians        | 0.17     | 4.97       | 0.034   | 1        |
| birds vs. arthropods                  | 8.50     | 4.73       | 1.797   | 1        |
| freshwater fishes vs. arthropods      | 0.00     | 4.23       | 0       | 1        |
| lichens vs. arthropods                | 0.00     | 5.98       | 0       | 1        |
| mammals vs. arthropods                | 8.15     | 4.39       | 1.857   | 1        |
| molluscs vs. arthropods               | 0.00     | 4.73       | 0       | 1        |
| mosses vs. arthropods                 | 0.00     | 7.33       | 0       | 1        |
| reptiles vs. arthropods               | 0.00     | 4.39       | 0       | 1        |
| vascular plants vs. arthropods        | 0.29     | 4.10       | 0.072   | 1        |
| freshwater fishes vs. birds           | -8.50    | 4.73       | -1.797  | 1        |
| lichens vs. birds                     | -8.50    | 6.35       | -1.339  | 1        |
| mammals vs. birds                     | -0.35    | 4.87       | -0.071  | 1        |
| molluscs vs. birds                    | -8.50    | 5.18       | -1.641  | 1        |
| mosses vs. birds                      | -8.50    | 7.63       | -1.115  | 1        |
| reptiles vs. birds                    | -8.50    | 4.87       | -1.744  | 1        |
| vascular plants vs. birds             | -8.21    | 4.62       | -1.777  | 1        |
| lichens vs. freshwater fishes         | 0.00     | 5.98       | 0       | 1        |
| mammals vs. freshwater fishes         | 8.15     | 4.39       | 1.857   | 1        |
| molluscs vs. freshwater fishes        | 0.00     | 4.73       | 0       | 1        |
| mosses vs. freshwater fishes          | 0.00     | 7.33       | 0       | 1        |
| reptiles vs. freshwater fishes        | 0.00     | 4.39       | 0       | 1        |
| vascular plants vs. freshwater fishes | 0.29     | 4.10       | 0.072   | 1        |
| mammals vs. lichens                   | 8.15     | 6.10       | 1.337   | 1        |
| molluscs vs. lichens                  | 0.00     | 6.35       | 0       | 1        |
| mosses vs. lichens                    | 0.00     | 8.46       | 0       | 1        |
| reptiles vs. lichens                  | 0.00     | 6.10       | 0       | 1        |
| vascular plants vs. lichens           | 0.29     | 5.89       | 0.05    | 1        |
| molluscs vs. mammals                  | -8.15    | 4.87       | -1.673  | 1        |
| mosses vs. mammals                    | -8.15    | 7.42       | -1.099  | 1        |
| reptiles vs. mammals                  | -8.15    | 4.54       | -1.794  | 1        |

| <b>comparison</b>            | <b>Estimate</b> | <b>Std. Error</b> | <b>t value</b> | <b>Pr(&gt; t )</b> |
|------------------------------|-----------------|-------------------|----------------|--------------------|
| vascular plants vs. mammals  | -7.86           | 4.27              | -1.841         | 1                  |
| mosses vs. molluscs          | 0.00            | 7.63              | 0              | 1                  |
| reptiles vs. molluscs        | 0.00            | 4.87              | 0              | 1                  |
| vascular plants vs. molluscs | 0.29            | 4.62              | 0.064          | 1                  |
| reptiles vs. mosses          | 0.00            | 7.42              | 0              | 1                  |
| vascular plants vs. mosses   | 0.29            | 7.26              | 0.041          | 1                  |
| vascular plants vs. reptiles | 0.29            | 4.27              | 0.069          | 1                  |
